# Supplementary material for: Studies on the stereochemical assignment of 3-acylidene 2-oxindoles
Source: Royal Society of Chemistry journal article supplement (doi:10.1039/c4ob00496e), 2014-01-01
Supplement: c4ob00496e2.pdf [file c4ob00496e2.pdf]

**Studies on the stereochemical assignment of 3-acylidene 2-oxindoles**  
**Electronic Supplementary Information 2**  
**Theoretical Studies**

Steven J. Edeson, Julong Jiang, Stephen Swanson, Panayiotis A. Procopiou,  
Harry Adams, Anthony J. H. M. Meijer\*, and Joseph P. A. Harrity\*

**Contents**

|                                                                  |    |
|------------------------------------------------------------------|----|
| <b>S1.</b> 3 – phenacylidene – 1H – indol – 2 – one              | 3  |
| General Information                                              | 3  |
| Cartesian Co-ordinates (XYZ format)                              | 3  |
| TD-DFT Calculations                                              | 4  |
| <b>S2.</b> 3 – phenacylidene – 1H – indol – 2 – one              | 7  |
| General Information                                              | 7  |
| Cartesian Co-ordinates (XYZ format)                              | 7  |
| TD-DFT Calculations                                              | 8  |
| <b>S3.</b> 4 – chloro – 3 – phenacylidene – 1H – indol – 2 – one | 12 |
| General Information                                              | 12 |
| Cartesian Co-ordinates (XYZ format)                              | 12 |
| TD-DFT Calculations                                              | 13 |
| <b>S4.</b> 4 – chloro – 3 – phenacylidene – 1H – indol – 2 – one | 17 |
| General Information                                              | 17 |
| Cartesian Co-ordinates (XYZ format)                              | 17 |
| TD-DFT Calculations                                              | 18 |
| <b>S5.</b> 5 – chloro – 3 – phenacylidene – 1H – indol – 2 – one | 22 |
| General Information                                              | 22 |
| Cartesian Co-ordinates (XYZ format)                              | 22 |
| TD-DFT Calculations                                              | 23 |
| <b>S6.</b> 5 – chloro – 3 – phenacylidene – 1H – indol – 2 – one | 27 |
| General Information                                              | 27 |
| Cartesian Co-ordinates (XYZ format)                              | 27 |
| TD-DFT Calculations                                              | 28 |
| <b>S7.</b> 6 – chloro – 3 – phenacylidene – 1H – indol – 2 – one | 32 |
| General Information                                              | 32 |

|                                                                   |    |
|-------------------------------------------------------------------|----|
| Cartesian Co-ordinates (XYZ format)                               | 32 |
| TD-DFT Calculations                                               | 33 |
| <b>S8.</b> 6 – chloro – 3 – phenacylidene – 1H – indol – 2 – one  | 37 |
| General Information                                               | 37 |
| Cartesian Co-ordinates (XYZ format)                               | 37 |
| TD-DFT Calculations                                               | 38 |
| <b>S9.</b> 7 – chloro – 3 – phenacylidene – 1H – indol – 2 – one  | 42 |
| General Information                                               | 42 |
| Cartesian Co-ordinates (XYZ format)                               | 42 |
| TD-DFT Calculations                                               | 43 |
| <b>S10.</b> 7 – chloro – 3 – phenacylidene – 1H – indol – 2 – one | 47 |
| General Information                                               | 47 |
| Cartesian Co-ordinates (XYZ format)                               | 47 |
| TD-DFT Calculations                                               | 48 |

**S1.** 3-phenacylidene-1H-indol-2-one

**General Information**

Log file : T2110-01-B-OPT-H-Zisomer.log

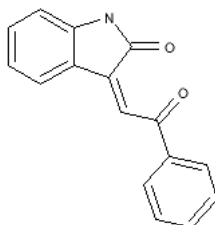

|                                 |   |                                                 |
|---------------------------------|---|-------------------------------------------------|
| SMILES                          | : | c1ccc(cc1)C(=O)C=C2c3ccccc3NC2=O                |
| Formula                         | : | C <sub>16</sub> H <sub>11</sub> NO <sub>2</sub> |
| Charge                          | : | 0                                               |
| Multiplicity                    | : | 1                                               |
| Dipole                          | : | 6.0634 Debye                                    |
| Energy                          | : | -821.74826633 a.u.                              |
| Number of imaginary frequencies | : | 0                                               |

**Cartesian Co-ordinates (XYZ format)**

30

|   |             |             |             |
|---|-------------|-------------|-------------|
| C | -0.20572527 | 0.54951090  | -0.00036246 |
| C | -1.53535497 | 0.64481246  | -0.38080150 |
| C | -2.14948821 | 1.88713372  | -0.63838840 |
| C | -1.41466248 | 3.06040287  | -0.51034117 |
| C | -0.07318053 | 2.98018003  | -0.12703553 |
| C | 0.51861417  | 1.74029374  | 0.12321275  |
| H | 0.25763935  | -0.41005796 | 0.19439387  |
| H | -1.87117052 | 4.02430868  | -0.70472455 |
| H | 0.51175070  | 3.88607216  | -0.02374462 |
| H | 1.56023955  | 1.69467175  | 0.41932866  |
| C | -3.69973350 | 0.11025839  | -0.95868182 |
| C | -3.54066086 | 1.61234593  | -1.00949597 |
| N | -2.47195363 | -0.37953067 | -0.57531202 |
| H | -2.28621984 | -1.36547542 | -0.46481413 |
| O | -4.69646502 | -0.54629070 | -1.20485985 |
| C | -4.52958965 | 2.44960451  | -1.34581399 |
| H | -4.34440327 | 3.52057505  | -1.38120234 |
| C | -5.90583086 | 2.04486370  | -1.81130862 |
| O | -6.11344624 | 2.00262690  | -3.01246190 |
| C | -6.98284340 | 1.82201540  | -0.80871278 |
| C | -6.74808598 | 1.93263650  | 0.56763917  |
| C | -8.27179241 | 1.51074898  | -1.26585758 |
| C | -7.78671455 | 1.73287177  | 1.47323143  |

|   |              |            |             |
|---|--------------|------------|-------------|
| H | -5.75664377  | 2.17461443 | 0.93056798  |
| C | -9.30548286  | 1.30865169 | -0.36123660 |
| H | -8.44088554  | 1.43082941 | -2.33248377 |
| C | -9.06403828  | 1.42003310 | 1.01059246  |
| H | -7.60011005  | 1.82028294 | 2.53706455  |
| H | -10.29916954 | 1.06566954 | -0.71915156 |
| H | -9.87169170  | 1.26328266 | 1.71645927  |

### TD-DFT Calculations

| No. | Energy (cm <sup>-1</sup> ) | Wavelength (nm) | Osc. Strength | Major contribs                                                |
|-----|----------------------------|-----------------|---------------|---------------------------------------------------------------|
| 1   | 26245                      | 381.03          | 0.04          | HOMO→LUMO (96%)                                               |
| 2   | 28791                      | 347.33          | 0.01          | HOMO→L+1 (83%)                                                |
| 3   | 31229                      | 320.21          | 0.03          | H-4→LUMO (26%), H-4→L+1 (15%), H-1→LUMO (18%), HOMO→L+1 (14%) |
| 4   | 32875                      | 304.19          | 0.05          | H-5→LUMO (14%), H-4→L+1 (24%), H-3→LUMO (21%), H-1→L+1 (14%)  |
| 5   | 33432                      | 299.12          | 0.17          | H-4→LUMO (14%), H-1→LUMO (61%)                                |
| 6   | 34968                      | 285.98          | 0.01          | H-5→LUMO (13%), H-4→LUMO (26%), H-1→L+1 (40%)                 |
| 7   | 35156                      | 284.45          | 0.01          | H-3→LUMO (20%), H-2→LUMO (76%)                                |
| 8   | 35639                      | 280.59          | 0.03          | H-4→LUMO (16%), H-4→L+1 (18%), H-3→LUMO (21%), H-1→L+1 (22%)  |
| 9   | 36582                      | 273.36          | 0.01          | H-5→LUMO (52%), H-4→L+1 (17%)                                 |
| 10  | 37182                      | 268.95          | 0.02          | H-3→L+1 (40%), H-2→L+1 (44%)                                  |
| 11  | 38632                      | 258.85          | 0.33          | H-5→L+1 (21%), H-3→L+1 (35%), H-2→L+1 (30%)                   |
| 12  | 40991                      | 243.96          | 0.33          | HOMO→L+3 (72%)                                                |
| 13  | 41161                      | 242.95          | 0.00          | HOMO→L+2 (96%)                                                |
| 14  | 41344                      | 241.87          | 0.10          | H-5→L+1 (55%), H-4→L+1 (11%), H-2→L+1 (11%)                   |
| 15  | 44155                      | 226.47          | 0.00          | HOMO→L+4 (84%), HOMO→L+5 (10%)                                |
| 16  | 45764                      | 218.51          | 0.04          | H-6→LUMO (10%), H-1→L+3 (25%), HOMO→L+5 (14%), HOMO→L+6 (42%) |
| 17  | 46445                      | 215.31          | 0.02          | H-1→L+2 (73%)                                                 |
| 18  | 46563                      | 214.76          | 0.04          | H-6→LUMO (46%), H-1→L+2 (15%), H-1→L+3 (22%)                  |
| 19  | 47123                      | 212.21          | 0.00          | HOMO→L+5 (56%), HOMO→L+6 (17%), HOMO→L+8 (16%)                |
| 20  | 47304                      | 211.40          | 0.00          | HOMO→L+7 (90%)                                                |
| 21  | 47598                      | 210.09          | 0.01          | H-7→LUMO (34%), H-6→L+1 (39%)                                 |
| 22  | 48570                      | 205.89          | 0.03          | H-4→L+2 (57%), H-3→L+2 (23%)                                  |
| 23  | 48945                      | 204.31          | 0.00          | H-5→L+3 (11%), H-4→L+3 (34%), H-3→L+3 (33%)                   |
| 24  | 49002                      | 204.07          | 0.10          | H-7→LUMO (20%), H-6→L+1 (42%)                                 |
| 25  | 49237                      | 203.10          | 0.13          | H-4→L+2 (22%), H-3→L+2 (17%), H-2→L+2 (24%)                   |
| 26  | 49414                      | 202.37          | 0.00          | HOMO→L+8 (68%)                                                |
| 27  | 49728                      | 201.10          | 0.01          | H-1→L+4 (77%), H-1→L+5 (10%)                                  |
| 28  | 50445                      | 198.24          | 0.10          | H-7→LUMO (14%), H-7→L+1 (24%), H-1→L+3 (14%), HOMO→L+6 (12%)  |
| 29  | 50639                      | 197.48          | 0.00          | HOMO→L+10 (77%)                                               |
| 30  | 50875                      | 196.56          | 0.01          | H-2→L+3 (46%), HOMO→L+9 (38%)                                 |
| 31  | 50894                      | 196.49          | 0.02          | H-7→L+1 (14%), H-2→L+3 (35%), HOMO→L+9 (31%)                  |
| 32  | 51194                      | 195.34          | 0.06          | H-7→L+1 (24%), H-4→L+3 (28%), H-3→L+3 (30%)                   |
| 33  | 51596                      | 193.81          | 0.10          | H-8→LUMO (32%), H-8→L+1 (30%)                                 |

|    |       |        |      |                                                               |
|----|-------|--------|------|---------------------------------------------------------------|
| 34 | 51666 | 193.55 | 0.22 | H-8→LUMO (14%), H-8→L+1 (12%), H-3→L+2 (11%), H-2→L+2 (10%)   |
| 35 | 52019 | 192.24 | 0.20 | H-7→L+1 (13%), H-3→L+2 (20%), H-2→L+2 (21%)                   |
| 36 | 52369 | 190.95 | 0.03 | H-9→LUMO (48%), H-1→L+5 (21%)                                 |
| 37 | 52413 | 190.79 | 0.01 | H-9→LUMO (25%), H-1→L+5 (22%), HOMO→L+11 (10%)                |
| 38 | 52538 | 190.34 | 0.01 | H-2→L+4 (62%), H-2→L+5 (16%)                                  |
| 39 | 52615 | 190.06 | 0.22 | H-5→L+2 (23%), H-5→L+3 (21%), H-1→L+6 (20%)                   |
| 40 | 52735 | 189.63 | 0.02 | H-5→L+2 (45%), HOMO→L+11 (15%)                                |
| 41 | 52779 | 189.47 | 0.02 | H-5→L+2 (12%), H-1→L+6 (10%), HOMO→L+11 (47%)                 |
| 42 | 52893 | 189.06 | 0.01 | H-1→L+7 (47%), HOMO→L+12 (17%), HOMO→L+14 (15%)               |
| 43 | 53064 | 188.45 | 0.02 | H-3→L+4 (62%), H-3→L+5 (15%)                                  |
| 44 | 53353 | 187.43 | 0.00 | H-1→L+7 (37%), HOMO→L+12 (39%), HOMO→L+14 (16%)               |
| 45 | 53576 | 186.65 | 0.25 | H-5→L+3 (26%), H-1→L+6 (16%)                                  |
| 46 | 54023 | 185.11 | 0.01 | HOMO→L+12 (20%), HOMO→L+14 (52%)                              |
| 47 | 54190 | 184.53 | 0.03 | H-4→L+4 (42%), H-4→L+8 (10%)                                  |
| 48 | 54528 | 183.39 | 0.01 | H-4→L+4 (26%), H-1→L+8 (37%)                                  |
| 49 | 54626 | 183.06 | 0.00 | HOMO→L+13 (82%)                                               |
| 50 | 54763 | 182.61 | 0.00 | H-9→LUMO (13%), H-8→LUMO (39%), H-8→L+1 (36%)                 |
| 51 | 55012 | 181.78 | 0.03 | H-4→L+6 (24%), H-3→L+6 (27%)                                  |
| 52 | 55213 | 181.12 | 0.01 | H-10→LUMO (17%), H-10→L+1 (19%), H-1→L+8 (28%)                |
| 53 | 55757 | 179.35 | 0.00 | H-10→LUMO (18%), H-10→L+1 (16%), H-1→L+10 (33%)               |
| 54 | 55983 | 178.63 | 0.01 | H-2→L+4 (16%), H-2→L+5 (43%), H-2→L+8 (10%)                   |
| 55 | 56058 | 178.39 | 0.03 | H-3→L+5 (30%), H-1→L+9 (13%)                                  |
| 56 | 56383 | 177.36 | 0.01 | H-1→L+9 (54%)                                                 |
| 57 | 56524 | 176.92 | 0.00 | H-11→LUMO (16%), H-2→L+5 (16%), H-2→L+6 (48%)                 |
| 58 | 56648 | 176.53 | 0.01 | H-11→LUMO (37%), H-10→LUMO (11%), H-2→L+6 (19%)               |
| 59 | 56802 | 176.05 | 0.00 | H-3→L+7 (11%), H-1→L+10 (20%)                                 |
| 60 | 56878 | 175.82 | 0.00 | HOMO→L+15 (74%)                                               |
| 61 | 56974 | 175.52 | 0.01 | H-4→L+6 (31%), H-3→L+6 (26%)                                  |
| 62 | 57118 | 175.08 | 0.01 | H-4→L+5 (18%), H-1→L+9 (10%)                                  |
| 63 | 57400 | 174.22 | 0.03 | H-2→L+9 (78%)                                                 |
| 64 | 57478 | 173.98 | 0.01 | H-12→LUMO (55%)                                               |
| 65 | 57527 | 173.83 | 0.01 | H-12→LUMO (18%), H-4→L+5 (39%)                                |
| 66 | 57667 | 173.41 | 0.02 | HOMO→L+16 (63%)                                               |
| 67 | 57843 | 172.88 | 0.02 | H-3→L+9 (13%), H-2→L+7 (36%)                                  |
| 68 | 58013 | 172.37 | 0.01 | H-9→L+1 (12%), H-5→L+4 (19%), H-1→L+11 (13%), HOMO→L+17 (22%) |
| 69 | 58100 | 172.12 | 0.02 | H-3→L+7 (26%), H-2→L+7 (31%)                                  |
| 70 | 58170 | 171.91 | 0.01 | H-9→L+1 (16%), H-3→L+9 (19%), HOMO→L+17 (20%)                 |
| 71 | 58192 | 171.84 | 0.00 | H-9→L+1 (10%), H-3→L+9 (36%), HOMO→L+17 (12%)                 |
| 72 | 58231 | 171.73 | 0.00 | H-9→L+1 (22%), H-1→L+11 (32%), HOMO→L+16 (17%)                |
| 73 | 58379 | 171.30 | 0.09 | H-10→LUMO (19%), H-10→L+1 (22%), H-2→L+8 (12%)                |
| 74 | 58529 | 170.86 | 0.03 | H-4→L+7 (25%), H-1→L+11 (14%)                                 |
| 75 | 58633 | 170.55 | 0.01 | H-5→L+6 (17%), H-1→L+12 (30%)                                 |

|     |       |        |      |                                                                               |
|-----|-------|--------|------|-------------------------------------------------------------------------------|
| 76  | 58743 | 170.23 | 0.01 | H-5→L+5 (10%), H-5→L+6 (35%), H-2→L+8 (11%)                                   |
| 77  | 58750 | 170.21 | 0.02 | H-4→L+7 (12%), H-3→L+8 (13%), H-2→L+8 (19%)                                   |
| 78  | 58919 | 169.72 | 0.03 | H-3→L+8 (32%), H-2→L+10 (13%)                                                 |
| 79  | 59047 | 169.36 | 0.02 | H-11→L+1 (25%), H-4→L+7 (10%), H-2→L+10 (21%)                                 |
| 80  | 59243 | 168.80 | 0.11 | H-4→L+8 (10%), H-4→L+9 (16%), H-3→L+10 (23%), H-1→L+14 (12%)                  |
| 81  | 59314 | 168.60 | 0.02 | HOMO→L+18 (53%), HOMO→L+19 (23%)                                              |
| 82  | 59480 | 168.12 | 0.10 | H-4→L+9 (10%), H-3→L+10 (16%), H-1→L+14 (19%)                                 |
| 83  | 59733 | 167.41 | 0.01 | H-13→LUMO (14%), H-4→L+9 (21%), H-1→L+14 (11%)                                |
| 84  | 59844 | 167.10 | 0.03 | H-13→LUMO (22%), H-1→L+13 (14%), H-1→L+14 (13%)                               |
| 85  | 59950 | 166.81 | 0.02 | H-13→LUMO (12%), H-4→L+8 (16%), H-4→L+9 (20%), H-4→L+10 (10%), H-1→L+13 (16%) |
| 86  | 60189 | 166.14 | 0.02 | H-13→LUMO (21%), H-7→L+3 (10%), HOMO→L+18 (14%), HOMO→L+19 (35%)              |
| 87  | 60405 | 165.55 | 0.01 | H-6→L+2 (30%), H-4→L+8 (11%), H-1→L+13 (25%)                                  |
| 88  | 60422 | 165.50 | 0.01 | H-6→L+2 (59%), H-1→L+13 (10%)                                                 |
| 89  | 60569 | 165.10 | 0.03 | H-6→L+3 (21%), H-5→L+5 (22%), H-5→L+6 (11%), H-5→L+7 (15%)                    |
| 90  | 60768 | 164.56 | 0.02 | H-6→L+3 (14%), H-5→L+5 (38%)                                                  |
| 91  | 60945 | 164.08 | 0.03 | H-6→L+3 (11%), H-5→L+7 (23%), H-5→L+8 (10%), H-5→L+10 (11%)                   |
| 92  | 61232 | 163.31 | 0.04 | H-5→L+7 (31%)                                                                 |
| 93  | 61610 | 162.31 | 0.01 | HOMO→L+20 (61%)                                                               |
| 94  | 61768 | 161.90 | 0.04 | H-7→L+3 (28%), HOMO→L+21 (22%)                                                |
| 95  | 61778 | 161.87 | 0.01 | H-2→L+12 (55%)                                                                |
| 96  | 61984 | 161.33 | 0.05 | H-5→L+8 (24%), H-3→L+12 (22%)                                                 |
| 97  | 62071 | 161.11 | 0.00 | H-14→LUMO (28%), H-8→L+2 (31%)                                                |
| 98  | 62129 | 160.96 | 0.00 | H-8→L+2 (41%), H-3→L+12 (10%)                                                 |
| 99  | 62179 | 160.83 | 0.00 | H-14→LUMO (22%), H-3→L+11 (17%), H-2→L+11 (13%)                               |
| 100 | 62347 | 160.39 | 0.01 | H-1→L+15 (67%)                                                                |

## S2. 3-phenacylidene-1H-indol-2-one

## General Information

Log file : T2110-02-OPT-H-Eisomer.log

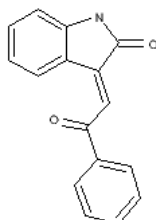

|                                   |   |                                                 |
|-----------------------------------|---|-------------------------------------------------|
| SMILES                            | : | c1ccc(cc1)C(=O)C=C2c3ccccc3NC2=O                |
| Formula                           | : | C <sub>16</sub> H <sub>11</sub> NO <sub>2</sub> |
| Charge                            | : | 0                                               |
| Multiplicity                      | : | 1                                               |
| Dipole                            | : | 1.6682 Debye                                    |
| Energy                            | : | -821.75390949 a.u.                              |
| Number of imaginary frequencies : |   | 0                                               |

## Cartesian Co-ordinates (XYZ format)

30

|   |             |             |             |
|---|-------------|-------------|-------------|
| C | 0.71683812  | -0.15687326 | -0.00845505 |
| C | 1.95855939  | 0.44754970  | 0.08906075  |
| C | 3.16514254  | -0.29568306 | 0.09586682  |
| C | 3.10058689  | -1.68884981 | 0.00490967  |
| C | 1.85387099  | -2.30828142 | -0.09656142 |
| C | 0.68062389  | -1.55212379 | -0.10278746 |
| H | -0.19401956 | 0.42920813  | -0.01156258 |
| H | 4.01367140  | -2.26389456 | 0.02063494  |
| H | 1.79741931  | -3.38777471 | -0.16758622 |
| H | -0.27910754 | -2.05011845 | -0.17963043 |
| C | 3.59410644  | 2.04092050  | 0.27069128  |
| C | 4.25759888  | 0.66597700  | 0.20282382  |
| N | 2.24410820  | 1.81168234  | 0.19294576  |
| H | 1.55682909  | 2.55054832  | 0.21333560  |
| O | 4.14055872  | 3.12290764  | 0.37145582  |
| C | 5.60851145  | 0.63970834  | 0.23565617  |
| H | 6.06818533  | 1.61775982  | 0.31640497  |
| C | 6.50655079  | -0.53112131 | 0.19899337  |
| O | 6.08241415  | -1.68200207 | 0.25792250  |
| C | 7.98332977  | -0.28427854 | 0.11694219  |
| C | 8.84084034  | -1.35894728 | 0.40084460  |
| C | 8.54199505  | 0.94751066  | -0.25596130 |
| C | 10.21873760 | -1.20414698 | 0.32917640  |
| H | 8.40377998  | -2.30934596 | 0.67947459  |

C 9.92410564 1.09766948 -0.34028077  
H 7.91106606 1.79094207 -0.50382507  
C 10.76431751 0.02659165 -0.04275067  
H 10.86972237 -2.03904390 0.56105518  
H 10.34327793 2.05147958 -0.63821739  
H 11.83981419 0.14831387 -0.10160708

### TD-DFT Calculations

| No. | Energy (cm <sup>-1</sup> ) | Wavelength (nm) | Osc. Strength | Major contribs                                                               |
|-----|----------------------------|-----------------|---------------|------------------------------------------------------------------------------|
| 1   | 20605                      | 485.31          | 0.08          | HOMO→LUMO (97%)<br>H-4→LUMO (36%), H-3→LUMO (25%), H-2→LUMO (35%)            |
| 2   | 24065                      | 415.55          | 0.00          | H-1→LUMO (94%)<br>H-3→LUMO (44%), H-2→LUMO (51%)                             |
| 3   | 27509                      | 363.51          | 0.52          | H-5→LUMO (92%)<br>H-4→LUMO (53%), H-3→LUMO (26%), H-2→LUMO (12%)             |
| 4   | 28771                      | 347.57          | 0.00          | HOMO→L+1 (97%)<br>H-6→LUMO (41%)                                             |
| 5   | 29639                      | 337.39          | 0.00          | HOMO→L+3 (44%)<br>H-4→L+1 (32%), H-3→L+1 (18%), H-2→L+1 (44%)                |
| 6   | 30831                      | 324.35          | 0.02          | H-7→LUMO (11%), H-6→LUMO (37%), H-1→L+1 (33%)                                |
| 7   | 36126                      | 276.81          | 0.00          | H-3→L+1 (34%), H-2→L+1 (16%), HOMO→L+2 (24%)                                 |
| 8   | 39537                      | 252.93          | 0.20          | H-7→LUMO (65%), H-1→L+1 (13%), HOMO→L+2 (15%)                                |
| 9   | 40409                      | 247.47          | 0.00          | H-3→L+1 (15%), HOMO→L+2 (56%)                                                |
| 10  | 41364                      | 241.76          | 0.05          | H-6→LUMO (10%), H-1→L+1 (40%), HOMO→L+3 (30%)                                |
| 11  | 41723                      | 239.67          | 0.03          | HOMO→L+4 (77%)                                                               |
| 12  | 42055                      | 237.78          | 0.15          | HOMO→L+6 (19%)<br>H-4→L+1 (51%), H-3→L+1 (11%), H-2→L+1 (16%), H-2→L+2 (10%) |
| 13  | 42735                      | 234.00          | 0.00          | H-9→LUMO (84%), H-8→LUMO (12%)                                               |
| 14  | 43608                      | 229.31          | 0.17          | H-9→LUMO (11%), H-8→LUMO (81%)                                               |
| 15  | 44730                      | 223.56          | 0.00          | H-1→L+3 (37%), HOMO→L+5 (53%)                                                |
| 16  | 45325                      | 220.63          | 0.14          | H-5→L+1 (87%)<br>H-4→L+2 (36%), H-3→L+2 (31%), H-2→L+2 (27%)                 |
| 17  | 45868                      | 218.02          | 0.01          | HOMO→L+4 (10%), HOMO→L+6 (59%)                                               |
| 18  | 46014                      | 217.32          | 0.00          | HOMO→L+7 (21%)<br>H-1→L+2 (86%)                                              |
| 19  | 46643                      | 214.40          | 0.04          | HOMO→L+6 (10%)                                                               |
| 20  | 46993                      | 212.80          | 0.00          | HOMO→L+7 (67%)<br>H-4→L+3 (23%), H-3→L+3 (22%), H-2→L+3 (49%)                |
| 21  | 47452                      | 210.74          | 0.01          | H-10→LUMO (93%)                                                              |
| 22  | 47715                      | 209.58          | 0.00          |                                                                              |
| 23  | 48077                      | 208.00          | 0.03          |                                                                              |
| 24  | 48135                      | 207.75          | 0.01          |                                                                              |
| 25  | 48905                      | 204.48          | 0.00          |                                                                              |
| 26  | 49489                      | 202.07          | 0.00          |                                                                              |



|    |       |        |      |                                                                               |
|----|-------|--------|------|-------------------------------------------------------------------------------|
| 27 | 50330 | 198.69 | 0.04 | H-12→LUMO (40%), H-5→L+3 (22%), H-2→L+3 (10%)                                 |
| 28 | 50469 | 198.14 | 0.00 | H-1→L+4 (28%), HOMO→L+8 (39%)                                                 |
| 29 | 50519 | 197.95 | 0.03 | H-4→L+2 (10%), H-3→L+3 (14%), H-1→L+3 (24%), HOMO→L+5 (16%)                   |
| 30 | 50656 | 197.41 | 0.19 | H-12→LUMO (20%), H-4→L+2 (12%), H-1→L+3 (14%), HOMO→L+5 (10%)                 |
| 31 | 50742 | 197.07 | 0.00 | H-1→L+4 (51%), HOMO→L+8 (35%)                                                 |
| 32 | 51212 | 195.27 | 0.17 | H-11→LUMO (34%), H-3→L+2 (14%), H-2→L+3 (16%)                                 |
| 33 | 51332 | 194.81 | 0.11 | H-4→L+3 (23%), H-2→L+2 (13%)                                                  |
| 34 | 51747 | 193.25 | 0.00 | HOMO→L+9 (76%)                                                                |
| 35 | 51805 | 193.03 | 0.02 | H-12→LUMO (16%), H-5→L+3 (47%)                                                |
| 36 | 52027 | 192.21 | 0.06 | H-4→L+3 (20%), H-3→L+3 (27%), H-2→L+4 (11%)                                   |
| 37 | 52106 | 191.92 | 0.04 | H-2→L+4 (59%), H-2→L+6 (14%)                                                  |
| 38 | 52633 | 190.00 | 0.03 | H-3→L+4 (31%), H-1→L+6 (36%)                                                  |
| 39 | 52695 | 189.77 | 0.43 | H-6→L+1 (10%), H-1→L+5 (41%), HOMO→L+10 (26%)                                 |
| 40 | 53051 | 188.50 | 0.19 | H-11→LUMO (12%), H-1→L+5 (22%), HOMO→L+10 (32%)                               |
| 41 | 53339 | 187.48 | 0.09 | H-11→LUMO (16%), H-6→L+1 (10%), H-3→L+2 (16%), H-2→L+2 (11%), HOMO→L+10 (16%) |
| 42 | 53469 | 187.02 | 0.01 | H-4→L+4 (13%), H-3→L+4 (37%), H-1→L+6 (16%)                                   |
| 43 | 53727 | 186.12 | 0.00 | HOMO→L+11 (32%), HOMO→L+13 (50%)                                              |
| 44 | 53915 | 185.48 | 0.04 | H-4→L+5 (25%), H-3→L+5 (18%), H-2→L+5 (31%)                                   |
| 45 | 53973 | 185.28 | 0.01 | H-4→L+4 (32%), H-1→L+7 (27%)                                                  |
| 46 | 54236 | 184.38 | 0.01 | H-13→LUMO (21%), H-1→L+7 (30%)                                                |
| 47 | 54254 | 184.32 | 0.01 | H-13→LUMO (19%), H-1→L+7 (26%), HOMO→L+11 (14%)                               |
| 48 | 54365 | 183.94 | 0.00 | H-5→L+2 (95%)                                                                 |
| 49 | 54468 | 183.59 | 0.01 | H-13→LUMO (12%), HOMO→L+11 (35%), HOMO→L+13 (10%)                             |
| 50 | 54971 | 181.91 | 0.00 | H-14→LUMO (85%)                                                               |
| 51 | 55070 | 181.59 | 0.02 | H-6→L+1 (20%), HOMO→L+12 (51%)                                                |
| 52 | 55420 | 180.44 | 0.05 | H-13→LUMO (11%), H-6→L+1 (31%), HOMO→L+12 (19%)                               |
| 53 | 55571 | 179.95 | 0.01 | H-2→L+6 (43%), HOMO→L+14 (16%)                                                |
| 54 | 55602 | 179.85 | 0.02 | H-13→LUMO (11%), H-2→L+6 (17%), HOMO→L+14 (37%)                               |
| 55 | 56022 | 178.50 | 0.01 | H-1→L+8 (53%)                                                                 |
| 56 | 56330 | 177.52 | 0.04 | H-5→L+4 (10%), H-2→L+7 (44%), H-2→L+9 (16%)                                   |
| 57 | 56411 | 177.27 | 0.02 | H-3→L+6 (40%), H-2→L+7 (11%)                                                  |

|    |       |        |      |                                                                              |
|----|-------|--------|------|------------------------------------------------------------------------------|
| 58 | 56491 | 177.02 | 0.06 | H-4→L+5 (11%), H-3→L+5 (23%), H-2→L+5 (42%)                                  |
| 59 | 56729 | 176.28 | 0.02 | H-5→L+4 (23%), H-4→L+6 (19%), H-1→L+9 (11%)                                  |
| 60 | 56914 | 175.70 | 0.05 | H-4→L+5 (22%), H-3→L+5 (27%)                                                 |
| 61 | 56983 | 175.49 | 0.04 | H-3→L+6 (10%), H-3→L+7 (15%), H-1→L+9 (10%)                                  |
| 62 | 57098 | 175.14 | 0.00 | H-5→L+5 (47%)                                                                |
| 63 | 57195 | 174.84 | 0.01 | H-4→L+6 (29%), H-1→L+9 (27%)                                                 |
| 64 | 57518 | 173.86 | 0.03 | H-7→L+1 (25%), H-3→L+7 (20%)                                                 |
| 65 | 57635 | 173.51 | 0.04 | H-7→L+1 (41%), H-5→L+4 (11%)                                                 |
| 66 | 57839 | 172.89 | 0.05 | HOMO→L+15 (54%), HOMO→L+18 (15%)                                             |
| 67 | 58090 | 172.15 | 0.00 | H-2→L+8 (53%)                                                                |
| 68 | 58143 | 171.99 | 0.00 | H-5→L+5 (15%), H-4→L+5 (11%), H-4→L+10 (14%), H-3→L+10 (12%), H-2→L+10 (19%) |
| 69 | 58257 | 171.65 | 0.02 | H-4→L+7 (38%), H-1→L+10 (15%)                                                |
| 70 | 58444 | 171.10 | 0.02 | H-1→L+10 (54%)                                                               |
| 71 | 58476 | 171.01 | 0.00 | H-8→L+1 (89%)                                                                |
| 72 | 58784 | 170.12 | 0.00 | H-1→L+10 (14%), HOMO→L+15 (13%), HOMO→L+16 (22%), HOMO→L+18 (27%)            |
| 73 | 58893 | 169.80 | 0.00 | H-3→L+8 (37%), H-1→L+11 (10%), HOMO→L+18 (13%)                               |
| 74 | 58990 | 169.52 | 0.00 | H-2→L+7 (17%), H-2→L+9 (48%)                                                 |
| 75 | 59064 | 169.31 | 0.00 | H-3→L+8 (15%), HOMO→L+16 (49%), HOMO→L+18 (17%)                              |
| 76 | 59374 | 168.42 | 0.01 | H-4→L+8 (40%), H-3→L+8 (14%), H-1→L+11 (17%)                                 |
| 77 | 59686 | 167.54 | 0.01 | H-4→L+8 (16%), H-1→L+11 (13%), H-1→L+13 (33%)                                |
| 78 | 59764 | 167.32 | 0.03 | H-3→L+7 (13%), H-3→L+9 (40%), H-1→L+13 (14%)                                 |
| 79 | 59835 | 167.13 | 0.00 | HOMO→L+17 (64%)                                                              |
| 80 | 59881 | 167.00 | 0.06 | H-7→L+3 (14%), H-6→L+3 (38%)                                                 |
| 81 | 60148 | 166.26 | 0.00 | H-5→L+6 (13%), H-4→L+9 (23%), H-1→L+11 (14%), H-1→L+13 (13%)                 |
| 82 | 60248 | 165.98 | 0.00 | H-4→L+9 (23%), H-1→L+11 (21%), H-1→L+12 (10%)                                |
| 83 | 60363 | 165.66 | 0.05 | H-16→LUMO (15%), H-15→LUMO (37%)                                             |
| 84 | 60567 | 165.11 | 0.01 | H-5→L+6 (52%), H-4→L+9 (15%)                                                 |
| 85 | 60615 | 164.97 | 0.01 | H-6→L+2 (75%)                                                                |
| 86 | 60762 | 164.58 | 0.02 | H-1→L+12 (24%), H-1→L+14 (24%), HOMO→L+19 (14%)                              |
| 87 | 61047 | 163.81 | 0.01 | H-7→L+3 (10%), H-1→L+12 (20%), HOMO→L+19 (44%)                               |
| 88 | 61118 | 163.62 | 0.13 | H-3→L+10 (28%), H-2→L+10 (21%)                                               |
| 89 | 61311 | 163.10 | 0.03 | H-1→L+12 (12%), H-1→L+14 (26%)                                               |

|     |       |        |      |                                                                |
|-----|-------|--------|------|----------------------------------------------------------------|
| 90  | 61324 | 163.07 | 0.04 | H-5→L+4 (12%), H-5→L+7 (61%)                                   |
| 91  | 61571 | 162.41 | 0.00 | H-4→L+10 (12%), H-2→L+10 (10%), H-2→L+14 (12%), H-1→L+14 (24%) |
| 92  | 61679 | 162.13 | 0.00 | H-10→L+1 (13%), H-9→L+1 (62%)                                  |
| 93  | 61866 | 161.64 | 0.00 | H-2→L+11 (59%), H-2→L+13 (25%)                                 |
| 94  | 62063 | 161.13 | 0.00 | H-8→L+2 (89%)                                                  |
| 95  | 62183 | 160.82 | 0.01 | H-16→LUMO (14%), H-2→L+12 (10%)                                |
| 96  | 62277 | 160.57 | 0.00 | H-2→L+11 (20%), H-2→L+13 (30%), H-2→L+15 (24%)                 |
| 97  | 62349 | 160.39 | 0.03 | H-10→L+1 (12%), H-7→L+3 (33%), H-6→L+3 (11%)                   |
| 98  | 62387 | 160.29 | 0.01 | H-10→L+1 (24%), H-4→L+10 (13%)                                 |
| 99  | 62444 | 160.14 | 0.01 | H-15→LUMO (10%), H-10→L+1 (36%), H-9→L+1 (10%)                 |
| 100 | 62650 | 159.62 | 0.01 | H-5→L+10 (16%), H-3→L+11 (12%), H-3→L+13 (13%), H-1→L+15 (13%) |

## S3. 4-chloro-3-phenacylidene-1H-indol-2-one

## General Information

Log file : T2010-01-OPT-Z-isomer-Chlorine-MeOH.log

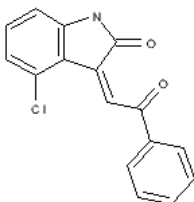

|                                   |   |                                                   |
|-----------------------------------|---|---------------------------------------------------|
| SMILES                            | : | c1ccc(cc1)C(=O)C=C2c3c(cccc3Cl)NC2=O              |
| Formula                           | : | C <sub>16</sub> H <sub>10</sub> ClNO <sub>2</sub> |
| Charge                            | : | 0                                                 |
| Multiplicity                      | : | 1                                                 |
| Dipole                            | : | 6.5232 Debye                                      |
| Energy                            | : | -1281.36802408 a.u.                               |
| Number of imaginary frequencies : |   | 0                                                 |

## Cartesian Co-ordinates (XYZ format)

30

```

C  1.16052270 -1.29697239  0.04353309
C  -0.16645576 -1.63972270  0.24250893
C  -0.77292269 -2.75231767 -0.38801295
C   0.01390628 -3.51990914 -1.24047542
C   1.35390198 -3.20058346 -1.46083343
C   1.91283071 -2.09707069 -0.82003284
H   1.59941280 -0.44024122  0.53866744
H   1.94824922 -3.81107116 -2.12709785
H   2.95408654 -1.85696387 -0.99784613
C  -2.33636069 -1.62548137  1.00386357
C  -2.16831684 -2.79341078  0.05981505
N  -1.11117446 -1.00192571  1.04940438
H  -0.93134958 -0.18554416  1.61542690
O  -3.34032393 -1.29310060  1.60689354
C  -3.17290831 -3.63369107 -0.22555164
H  -3.01340079 -4.46936083 -0.89794940
C  -4.54227352 -3.60355735  0.40799567
O  -4.74197817 -4.33396721  1.36378419
C  -5.62045431 -2.79233980 -0.21815898
C  -6.90758085 -2.84344816  0.33654794
C  -5.38748789 -1.99761546 -1.34765136
C  -7.94169903 -2.10780025 -0.22661991
H  -7.07516003 -3.46383286  1.20815134
C  -6.42650414 -1.26292157 -1.91270399

```

H -4.39737988 -1.95259380 -1.78475976  
 C -7.70219183 -1.31621695 -1.35294378  
 H -8.93416405 -2.14835262 0.20681755  
 H -6.24148703 -0.64978498 -2.78675938  
 H -8.51016426 -0.74274927 -1.79273212  
 Cl -0.65548187 -4.92076445 -2.06960750

### TD-DFT Calculations

| No. | Energy (cm <sup>-1</sup> ) | Wavelength (nm) | Osc. Strength | Major contribs                                                 |
|-----|----------------------------|-----------------|---------------|----------------------------------------------------------------|
| 1   | 27087                      | 369.18          | 0.04          | HOMO→LUMO (95%)                                                |
| 2   | 29744                      | 336.20          | 0.02          | H-4→L+1 (10%), H-1→L+1 (10%), HOMO→L+1 (64%)                   |
| 3   | 31609                      | 316.36          | 0.05          | H-4→LUMO (24%), H-1→LUMO (22%), HOMO→L+1 (28%)                 |
| 4   | 32559                      | 307.13          | 0.10          | H-4→L+1 (34%), H-1→LUMO (27%), H-1→L+1 (16%)                   |
| 5   | 33150                      | 301.66          | 0.06          | H-5→LUMO (12%), H-4→LUMO (26%), H-3→LUMO (19%), H-1→LUMO (32%) |
| 6   | 34590                      | 289.10          | 0.00          | H-4→LUMO (32%), H-3→LUMO (18%), H-2→LUMO (26%), H-1→L+1 (14%)  |
| 7   | 34814                      | 287.24          | 0.00          | H-3→LUMO (23%), H-2→LUMO (67%)                                 |
| 8   | 35313                      | 283.18          | 0.02          | H-4→L+1 (23%), H-3→LUMO (12%), H-1→L+1 (46%)                   |
| 9   | 36250                      | 275.86          | 0.00          | H-5→LUMO (64%), H-4→L+1 (10%), H-3→LUMO (10%)                  |
| 10  | 36882                      | 271.14          | 0.02          | H-3→L+1 (32%), H-2→L+1 (54%)                                   |
| 11  | 38793                      | 257.78          | 0.41          | H-5→L+1 (16%), H-3→L+1 (46%), H-2→L+1 (27%)                    |
| 12  | 41058                      | 243.56          | 0.28          | HOMO→L+2 (72%)                                                 |
| 13  | 41674                      | 239.96          | 0.08          | H-5→L+1 (71%)                                                  |
| 14  | 42537                      | 235.09          | 0.01          | HOMO→L+3 (98%)                                                 |
| 15  | 44966                      | 222.39          | 0.04          | H-1→L+2 (62%), HOMO→L+5 (26%)                                  |
| 16  | 45214                      | 221.17          | 0.00          | HOMO→L+4 (73%), HOMO→L+6 (10%)                                 |
| 17  | 45453                      | 220.01          | 0.11          | HOMO→L+7 (11%), H-6→LUMO (74%)                                 |
| 18  | 45746                      | 218.60          | 0.00          | HOMO→L+5 (16%), HOMO→L+4 (10%)                                 |
| 19  | 45861                      | 218.05          | 0.00          | HOMO→L+6 (84%), H-8→LUMO (70%), H-7→LUMO (21%)                 |
| 20  | 46397                      | 215.53          | 0.02          | H-1→L+3 (88%)                                                  |
| 21  | 47472                      | 210.65          | 0.15          | H-8→LUMO (14%), H-7→LUMO (39%), H-7→L+1 (11%), H-1→L+5 (12%)   |
| 22  | 47965                      | 208.49          | 0.01          | H-4→L+2 (38%), H-3→L+2 (30%)                                   |
| 23  | 48249                      | 207.26          | 0.00          | H-1→L+4 (33%), H-1→L+6 (45%), H-1→L+7 (10%)                    |
| 24  | 48532                      | 206.05          | 0.12          | H-7→L+1 (28%), H-6→L+1 (29%), H-1→L+5 (11%)                    |
| 25  | 48664                      | 205.49          | 0.01          | H-4→L+3 (61%), H-3→L+3 (13%)                                   |

|    |       |        |      |                                                                                            |
|----|-------|--------|------|--------------------------------------------------------------------------------------------|
| 26 | 49049 | 203.88 | 0.01 | HOMO→L+7 (43%),<br>HOMO→L+8 (10%)                                                          |
| 27 | 49228 | 203.13 | 0.08 | H-2→L+2 (32%), HOMO→L+7<br>(10%)                                                           |
| 28 | 49232 | 203.12 | 0.20 | H-3→L+3 (16%), H-2→L+3<br>(14%), HOMO→L+5 (12%)                                            |
| 29 | 49354 | 202.62 | 0.01 | HOMO→L+7 (12%),<br>HOMO→L+8 (82%)                                                          |
| 30 | 49451 | 202.22 | 0.05 | H-3→L+2 (18%), H-2→L+2<br>(55%)                                                            |
| 31 | 49798 | 200.81 | 0.01 | H-7→L+1 (19%), H-6→L+1<br>(30%), H-4→L+2 (19%), H-<br>3→L+2 (20%)                          |
| 32 | 49845 | 200.62 | 0.01 | H-1→L+4 (46%), H-1→L+6<br>(32%)                                                            |
| 33 | 50034 | 199.86 | 0.13 | H-6→L+1 (18%), H-4→L+2<br>(25%), H-3→L+2 (16%)                                             |
| 34 | 50968 | 196.20 | 0.01 | H-8→L+1 (65%), H-7→L+1<br>(14%)                                                            |
| 35 | 51431 | 194.43 | 0.17 | H-7→LUMO (11%), H-5→L+2<br>(22%), H-1→L+5 (25%)                                            |
| 36 | 51512 | 194.13 | 0.06 | HOMO→L+10 (55%)                                                                            |
| 37 | 51787 | 193.10 | 0.03 | H-9→LUMO (18%), H-9→L+1<br>(33%), HOMO→L+9 (10%),<br>HOMO→L+11 (10%)                       |
| 38 | 51897 | 192.69 | 0.34 | H-5→L+2 (16%), H-3→L+3<br>(17%), H-2→L+3 (25%)                                             |
| 39 | 51907 | 192.65 | 0.07 | H-9→L+1 (15%), H-8→L+1<br>(10%), H-5→L+2 (24%)                                             |
| 40 | 52079 | 192.02 | 0.03 | HOMO→L+9 (14%),<br>HOMO→L+10 (21%),<br>HOMO→L+11 (29%)                                     |
| 41 | 52507 | 190.45 | 0.04 | HOMO→L+9 (50%),<br>HOMO→L+11 (27%)                                                         |
| 42 | 52551 | 190.29 | 0.00 | H-2→L+4 (71%), H-2→L+7<br>(21%)                                                            |
| 43 | 52954 | 188.84 | 0.00 | H-3→L+4 (14%), H-1→L+7<br>(47%)                                                            |
| 44 | 53106 | 188.30 | 0.01 | H-3→L+4 (60%), H-3→L+7<br>(14%), H-1→L+7 (10%)                                             |
| 45 | 53235 | 187.85 | 0.00 | H-5→L+3 (91%)                                                                              |
| 46 | 53626 | 186.48 | 0.00 | H-1→L+8 (86%)                                                                              |
| 47 | 53744 | 186.07 | 0.01 | H-4→L+5 (34%), H-3→L+5<br>(31%)                                                            |
| 48 | 54010 | 185.15 | 0.00 | H-9→LUMO (60%), H-9→L+1<br>(31%)                                                           |
| 49 | 54094 | 184.86 | 0.02 | H-4→L+4 (51%)                                                                              |
| 50 | 54291 | 184.19 | 0.00 | HOMO→L+12 (73%)                                                                            |
| 51 | 54686 | 182.86 | 0.00 | H-10→LUMO (42%), H-<br>1→L+10 (13%)                                                        |
| 52 | 54847 | 182.33 | 0.03 | H-10→LUMO (34%), H-<br>1→L+10 (16%)                                                        |
| 53 | 54862 | 182.27 | 0.00 | H-2→L+5 (87%)                                                                              |
| 54 | 55167 | 181.27 | 0.00 | H-4→L+5 (18%), H-3→L+5<br>(32%), HOMO→L+14 (20%)                                           |
| 55 | 55240 | 181.03 | 0.00 | H-4→L+5 (17%), H-3→L+5<br>(17%), HOMO→L+14 (24%),<br>HOMO→L+15 (18%)                       |
| 56 | 55489 | 180.22 | 0.00 | H-11→LUMO (12%), H-<br>11→L+1 (20%), H-1→L+10<br>(12%), H-1→L+11 (10%),<br>HOMO→L+13 (15%) |

|    |       |        |      |                                                                      |
|----|-------|--------|------|----------------------------------------------------------------------|
| 57 | 55553 | 180.01 | 0.00 | H-11→LUMO (10%),<br>HOMO→L+13 (36%)                                  |
| 58 | 55665 | 179.65 | 0.01 | H-13→LUMO (24%),<br>H-12→LUMO (26%),<br>HOMO→L+13 (11%)              |
| 59 | 55703 | 179.52 | 0.01 | H-2→L+4 (14%), H-2→L+6<br>(10%), H-2→L+7 (56%)                       |
| 60 | 55859 | 179.02 | 0.00 | H-11→L+1 (10%), H-1→L+9<br>(17%), H-1→L+11 (26%)                     |
| 61 | 55903 | 178.88 | 0.02 | H-3→L+6 (24%), H-3→L+7<br>(39%)                                      |
| 62 | 56088 | 178.29 | 0.02 | H-4→L+6 (26%), H-3→L+6<br>(16%), H-3→L+7 (16%)                       |
| 63 | 56191 | 177.97 | 0.00 | HOMO→L+13 (10%),<br>HOMO→L+14 (20%),<br>HOMO→L+15 (51%)              |
| 64 | 56304 | 177.61 | 0.01 | H-1→L+9 (46%), H-1→L+11<br>(12%)                                     |
| 65 | 56376 | 177.38 | 0.00 | H-2→L+6 (69%)                                                        |
| 66 | 56650 | 176.52 | 0.00 | H-13→LUMO (47%), H-<br>12→LUMO (33%)                                 |
| 67 | 56765 | 176.17 | 0.00 | H-4→L+6 (27%), H-3→L+6<br>(41%)                                      |
| 68 | 57100 | 175.13 | 0.01 | H-5→L+5 (11%), H-4→L+10<br>(31%), H-1→L+10 (14%)                     |
| 69 | 57186 | 174.87 | 0.02 | H-6→L+2 (11%), H-5→L+5<br>(42%)                                      |
| 70 | 57309 | 174.49 | 0.01 | H-7→L+2 (10%), H-6→L+2<br>(54%), H-5→L+5 (19%)                       |
| 71 | 57426 | 174.14 | 0.01 | H-5→L+4 (26%), H-4→L+7<br>(31%)                                      |
| 72 | 57468 | 174.01 | 0.03 | H-2→L+9 (83%)                                                        |
| 73 | 57798 | 173.02 | 0.02 | H-11→LUMO (23%), H-<br>11→L+1 (11%), H-5→L+4<br>(13%), H-4→L+7 (13%) |
| 74 | 57899 | 172.71 | 0.00 | H-11→LUMO (17%), H-<br>11→L+1 (13%), H-5→L+4<br>(14%), H-4→L+7 (16%) |
| 75 | 57984 | 172.46 | 0.00 | H-8→L+2 (74%), H-7→L+2<br>(10%)                                      |
| 76 | 58158 | 171.95 | 0.00 | H-1→L+12 (75%)                                                       |
| 77 | 58239 | 171.71 | 0.00 | H-3→L+9 (79%)                                                        |
| 78 | 58343 | 171.40 | 0.03 | H-10→L+1 (61%), H-2→L+10<br>(15%)                                    |
| 79 | 58450 | 171.09 | 0.01 | HOMO→L+16 (70%)                                                      |
| 80 | 58554 | 170.78 | 0.07 | H-2→L+8 (51%)                                                        |
| 81 | 58730 | 170.27 | 0.04 | H-5→L+4 (15%), H-3→L+8<br>(45%)                                      |
| 82 | 58886 | 169.82 | 0.05 | H-12→L+1 (11%),<br>HOMO→L+17 (25%)                                   |
| 83 | 59043 | 169.37 | 0.01 | H-12→L+1 (16%),<br>HOMO→L+17 (19%)                                   |
| 84 | 59271 | 168.72 | 0.05 | H-1→L+13 (16%), H-1→L+15<br>(21%)                                    |
| 85 | 59279 | 168.69 | 0.03 | H-1→L+14 (35%), H-1→L+15<br>(11%)                                    |
| 86 | 59457 | 168.19 | 0.02 | H-4→L+8 (39%), H-4→L+9<br>(10%), H-1→L+13 (13%)                      |
| 87 | 59536 | 167.96 | 0.13 | H-3→L+8 (15%), H-3→L+10<br>(13%), H-1→L+13 (18%)                     |
| 88 | 59598 | 167.79 | 0.00 | H-2→L+11 (70%)                                                       |
| 89 | 59758 | 167.34 | 0.04 | H-4→L+9 (30%), HOMO→L+18<br>(11%)                                    |

|     |       |        |      |                                                                                |
|-----|-------|--------|------|--------------------------------------------------------------------------------|
| 90  | 59840 | 167.11 | 0.01 | H-3→L+11 (66%)                                                                 |
| 91  | 59996 | 166.68 | 0.01 | H-7→L+2 (10%), H-5→L+6 (14%), H-1→L+13 (13%), HOMO→L+18 (30%)                  |
| 92  | 60073 | 166.47 | 0.01 | H-5→L+6 (59%), HOMO→L+18 (23%)                                                 |
| 93  | 60232 | 166.02 | 0.01 | H-1→L+14 (21%), H-1→L+15 (38%)                                                 |
| 94  | 60450 | 165.43 | 0.00 | H-14→LUMO (90%)                                                                |
| 95  | 60615 | 164.97 | 0.04 | H-7→L+2 (17%), HOMO→L+18 (15%), HOMO→L+20 (23%)                                |
| 96  | 60763 | 164.57 | 0.01 | H-7→L+3 (25%), H-6→L+3 (53%)                                                   |
| 97  | 61028 | 163.86 | 0.02 | H-7→L+2 (11%), HOMO→L+17 (11%), HOMO→L+20 (33%)                                |
| 98  | 61097 | 163.67 | 0.00 | H-4→L+11 (51%)                                                                 |
| 99  | 61251 | 163.26 | 0.02 | H-5→L+7 (59%)                                                                  |
| 100 | 61449 | 162.74 | 0.05 | H-12→L+1 (17%), H-5→L+7 (11%), H-5→L+10 (11%), H-3→L+10 (10%), HOMO→L+19 (12%) |

---



## S4. 4-chloro-3-phenacylidene-1H-indol-2-one

## General Information

Log file : T2010-02-OPT-E-isomer-Chlorine-MeOH.log

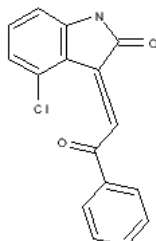

|                                   |   |                                                   |
|-----------------------------------|---|---------------------------------------------------|
| SMILES                            | : | c1ccc(cc1)C(=O)C=C2c3c(cccc3Cl)NC2=O              |
| Formula                           | : | C <sub>16</sub> H <sub>10</sub> ClNO <sub>2</sub> |
| Charge                            | : | 0                                                 |
| Multiplicity                      | : | 1                                                 |
| Dipole                            | : | 4.1442 Debye                                      |
| Energy                            | : | -1281.36432731 a.u.                               |
| Number of imaginary frequencies : |   | 0                                                 |

## Cartesian Co-ordinates (XYZ format)

30

|   |             |             |             |
|---|-------------|-------------|-------------|
| C | -0.35428497 | -0.61643422 | 0.18292153  |
| C | -1.52710772 | 0.02227397  | -0.18056856 |
| C | -2.79907346 | -0.60632235 | -0.13627197 |
| C | -2.84885120 | -1.89902246 | 0.38615209  |
| C | -1.68135059 | -2.56811142 | 0.75802135  |
| C | -0.44893676 | -1.93223143 | 0.64030939  |
| H | 0.60012943  | -0.10901614 | 0.12481727  |
| H | -1.74644029 | -3.57325029 | 1.15182340  |
| H | 0.44916135  | -2.46315932 | 0.93182778  |
| C | -2.99198651 | 1.66560721  | -0.82855254 |
| C | -3.77326965 | 0.37830603  | -0.61717564 |
| N | -1.67571318 | 1.34191835  | -0.60734266 |
| H | -0.92445374 | 2.01287913  | -0.67576927 |
| O | -3.42332077 | 2.75162053  | -1.16448700 |
| C | -5.06766558 | 0.38611865  | -0.97426045 |
| H | -5.45324230 | 1.36384487  | -1.26240468 |
| C | -6.01897717 | -0.74686712 | -1.19164693 |
| O | -5.72774887 | -1.62302458 | -1.99023163 |
| C | -7.33677769 | -0.70443225 | -0.50147295 |
| C | -8.30868816 | -1.65762353 | -0.83928096 |
| C | -7.62172651 | 0.25202152  | 0.48201764  |
| C | -9.54497242 | -1.65015602 | -0.20735160 |
| H | -8.07513332 | -2.39286399 | -1.59926975 |

|    |              |             |             |
|----|--------------|-------------|-------------|
| C  | -8.86107349  | 0.25657472  | 1.11623538  |
| H  | -6.87528563  | 0.98724425  | 0.75929654  |
| C  | -9.82269955  | -0.69213611 | 0.77121031  |
| H  | -10.29406929 | -2.38676429 | -0.47316575 |
| H  | -9.07591152  | 0.99693799  | 1.87761927  |
| H  | -10.78814602 | -0.68693578 | 1.26409435  |
| Cl | -4.37495422  | -2.71306872 | 0.67960650  |

### TD-DFT Calculations

| No. | Energy (cm <sup>-1</sup> ) | Wavelength (nm) | Osc. Strength | Major contribs                                                |
|-----|----------------------------|-----------------|---------------|---------------------------------------------------------------|
| 1   | 24700                      | 404.86          | 0.06          | HOMO→LUMO (97%)                                               |
| 2   | 28347                      | 352.78          | 0.03          | H-4→LUMO (66%), H-1→LUMO (16%)                                |
| 3   | 29569                      | 338.19          | 0.15          | H-4→LUMO (15%), H-1→LUMO (74%)                                |
| 4   | 32364                      | 308.99          | 0.01          | H-3→LUMO (12%), H-2→LUMO (86%)                                |
| 5   | 32691                      | 305.90          | 0.02          | HOMO→L+1 (88%)                                                |
| 6   | 33171                      | 301.47          | 0.07          | H-5→LUMO (38%), H-4→LUMO (12%), H-3→LUMO (36%)                |
| 7   | 33829                      | 295.61          | 0.01          | H-5→LUMO (42%), H-3→LUMO (37%)                                |
| 8   | 36102                      | 277.00          | 0.02          | H-4→L+1 (14%), H-1→L+1 (68%)                                  |
| 9   | 37425                      | 267.20          | 0.01          | H-4→L+1 (53%), H-3→L+1 (10%), H-1→L+1 (17%)                   |
| 10  | 39130                      | 255.56          | 0.02          | H-3→L+1 (20%), H-2→L+1 (68%)                                  |
| 11  | 40949                      | 244.21          | 0.48          | H-3→L+1 (12%), HOMO→L+2 (51%)                                 |
| 12  | 41428                      | 241.38          | 0.21          | H-6→LUMO (10%), H-3→L+1 (38%), H-2→L+1 (14%), HOMO→L+2 (15%)  |
| 13  | 42557                      | 234.98          | 0.03          | H-8→LUMO (17%), H-7→LUMO (17%), H-6→LUMO (45%)                |
| 14  | 42756                      | 233.89          | 0.00          | HOMO→L+3 (88%)                                                |
| 15  | 43011                      | 232.50          | 0.02          | H-8→LUMO (24%), H-7→LUMO (24%), H-6→LUMO (30%), H-5→L+1 (11%) |
| 16  | 43558                      | 229.58          | 0.01          | H-8→LUMO (16%), H-5→L+1 (69%)                                 |
| 17  | 44779                      | 223.32          | 0.10          | H-8→LUMO (30%), H-7→LUMO (40%)                                |
| 18  | 45009                      | 222.18          | 0.12          | H-1→L+2 (51%), HOMO→L+4 (18%), HOMO→L+5 (20%)                 |
| 19  | 45505                      | 219.75          | 0.01          | HOMO→L+4 (56%), HOMO→L+5 (12%), HOMO→L+6 (20%)                |
| 20  | 46134                      | 216.76          | 0.00          | H-1→L+3 (47%), HOMO→L+6 (26%), HOMO→L+7 (16%)                 |
| 21  | 46277                      | 216.09          | 0.01          | H-1→L+3 (47%), HOMO→L+6 (23%), HOMO→L+7 (14%)                 |
| 22  | 48150                      | 207.68          | 0.00          | H-4→L+2 (21%), H-4→L+3 (51%), H-3→L+3 (10%)                   |
| 23  | 48377                      | 206.71          | 0.09          | H-4→L+2 (19%), H-4→L+3 (19%), H-1→L+2 (11%), HOMO→L+5 (15%)   |

|    |       |        |      |                                                             |
|----|-------|--------|------|-------------------------------------------------------------|
| 24 | 48585 | 205.83 | 0.05 | H-4→L+2 (30%)                                               |
| 25 | 49065 | 203.81 | 0.00 | H-1→L+4 (12%), HOMO→L+7 (37%), HOMO→L+9 (13%)               |
| 26 | 49313 | 202.79 | 0.02 | H-2→L+2 (22%), HOMO→L+8 (27%)                               |
| 27 | 49336 | 202.69 | 0.03 | H-2→L+2 (20%), H-1→L+6 (11%), HOMO→L+8 (22%)                |
| 28 | 49401 | 202.43 | 0.01 | H-1→L+6 (11%), H-1→L+7 (13%), HOMO→L+8 (18%)                |
| 29 | 49466 | 202.16 | 0.02 | H-9→LUMO (48%), H-2→L+2 (29%)                               |
| 30 | 49689 | 201.25 | 0.14 | H-6→L+1 (19%), H-3→L+3 (10%), H-2→L+2 (17%)                 |
| 31 | 49874 | 200.51 | 0.07 | H-9→LUMO (14%), H-6→L+1 (24%), H-3→L+2 (20%), H-2→L+3 (10%) |
| 32 | 49935 | 200.26 | 0.03 | H-3→L+2 (20%), H-1→L+4 (34%), HOMO→L+8 (11%)                |
| 33 | 50016 | 199.94 | 0.07 | H-3→L+2 (36%), H-1→L+4 (20%)                                |
| 34 | 50237 | 199.05 | 0.08 | H-7→L+1 (39%), H-5→L+2 (11%), H-1→L+5 (12%), H-1→L+6 (11%)  |
| 35 | 50754 | 197.03 | 0.06 | H-8→L+1 (38%), H-7→L+1 (16%), H-1→L+5 (12%)                 |
| 36 | 51217 | 195.25 | 0.10 | H-5→L+2 (46%), H-4→L+2 (10%)                                |
| 37 | 51545 | 194.01 | 0.01 | HOMO→L+7 (10%), HOMO→L+9 (71%)                              |
| 38 | 51825 | 192.96 | 0.42 | H-10→LUMO (20%), H-3→L+3 (18%), H-2→L+3 (35%)               |
| 39 | 52044 | 192.14 | 0.01 | H-10→LUMO (24%), HOMO→L+10 (25%), HOMO→L+11 (20%)           |
| 40 | 52246 | 191.40 | 0.08 | H-8→L+1 (18%), HOMO→L+10 (27%)                              |
| 41 | 52547 | 190.31 | 0.00 | H-2→L+4 (59%), H-2→L+5 (16%), H-2→L+6 (15%)                 |
| 42 | 52694 | 189.77 | 0.01 | H-13→LUMO (11%), H-11→LUMO (51%)                            |
| 43 | 52916 | 188.98 | 0.05 | H-12→LUMO (12%), H-10→LUMO (23%), HOMO→L+10 (12%)           |
| 44 | 52942 | 188.89 | 0.02 | H-1→L+6 (14%), H-1→L+7 (23%), H-1→L+8 (15%)                 |
| 45 | 53311 | 187.58 | 0.02 | H-12→LUMO (37%), H-11→LUMO (17%)                            |
| 46 | 53335 | 187.49 | 0.05 | HOMO→L+10 (13%), HOMO→L+11 (47%)                            |
| 47 | 53416 | 187.21 | 0.00 | H-3→L+4 (43%), H-3→L+6 (10%), H-1→L+8 (16%)                 |
| 48 | 53701 | 186.22 | 0.00 | H-1→L+7 (26%), H-1→L+8 (47%)                                |
| 49 | 53996 | 185.20 | 0.01 | H-4→L+4 (17%), H-4→L+5 (47%)                                |
| 50 | 54302 | 184.15 | 0.00 | H-4→L+4 (58%), H-4→L+5 (15%)                                |
| 51 | 54368 | 183.93 | 0.00 | HOMO→L+12 (69%)                                             |
| 52 | 54512 | 183.45 | 0.00 | H-5→L+3 (95%)                                               |
| 53 | 54709 | 182.79 | 0.00 | HOMO→L+13 (12%), HOMO→L+14 (48%), HOMO→L+15 (27%)           |

|    |       |        |      |                                                              |
|----|-------|--------|------|--------------------------------------------------------------|
| 54 | 55016 | 181.76 | 0.01 | H-2→L+4 (18%), H-2→L+5 (53%)                                 |
| 55 | 55222 | 181.09 | 0.01 | H-1→L+9 (40%)                                                |
| 56 | 55486 | 180.22 | 0.01 | H-13→LUMO (22%), H-3→L+5 (21%)                               |
| 57 | 55579 | 179.92 | 0.00 | H-13→LUMO (18%), H-3→L+4 (12%), H-3→L+5 (27%)                |
| 58 | 55632 | 179.75 | 0.03 | H-3→L+5 (10%), H-1→L+9 (14%)                                 |
| 59 | 55717 | 179.48 | 0.00 | H-1→L+9 (10%), HOMO→L+13 (38%)                               |
| 60 | 55898 | 178.90 | 0.00 | H-9→L+1 (50%)                                                |
| 61 | 55926 | 178.81 | 0.01 | H-9→L+1 (24%), H-1→L+10 (32%), H-1→L+11 (15%)                |
| 62 | 56217 | 177.88 | 0.01 | H-2→L+6 (36%)                                                |
| 63 | 56284 | 177.67 | 0.01 | H-5→L+5 (21%), H-2→L+7 (13%)                                 |
| 64 | 56340 | 177.49 | 0.01 | H-5→L+5 (10%), H-4→L+6 (10%), H-2→L+7 (34%)                  |
| 65 | 56441 | 177.17 | 0.00 | H-6→L+2 (40%), HOMO→L+15 (15%)                               |
| 66 | 56550 | 176.83 | 0.00 | H-6→L+2 (12%), HOMO→L+14 (16%), HOMO→L+15 (33%)              |
| 67 | 56635 | 176.57 | 0.04 | H-6→L+2 (12%), H-3→L+6 (31%), H-2→L+7 (14%)                  |
| 68 | 56864 | 175.86 | 0.01 | H-1→L+10 (17%), H-1→L+11 (39%)                               |
| 69 | 57033 | 175.34 | 0.01 | H-3→L+7 (66%)                                                |
| 70 | 57042 | 175.31 | 0.05 | H-5→L+4 (33%)                                                |
| 71 | 57204 | 174.81 | 0.00 | H-8→L+2 (27%), H-7→L+2 (47%)                                 |
| 72 | 57377 | 174.29 | 0.02 | H-14→LUMO (22%), H-5→L+4 (10%), H-5→L+5 (11%), H-4→L+7 (18%) |
| 73 | 57651 | 173.46 | 0.01 | H-2→L+6 (11%), H-2→L+7 (10%), H-2→L+8 (31%), H-2→L+10 (36%)  |
| 74 | 57821 | 172.95 | 0.01 | HOMO→L+13 (10%), HOMO→L+16 (54%)                             |
| 75 | 57932 | 172.62 | 0.01 | H-14→LUMO (51%), H-5→L+5 (10%)                               |
| 76 | 58067 | 172.22 | 0.00 | H-4→L+6 (18%), H-4→L+7 (36%), H-4→L+8 (13%)                  |
| 77 | 58269 | 171.62 | 0.01 | H-1→L+12 (50%)                                               |
| 78 | 58436 | 171.13 | 0.00 | H-3→L+8 (39%), H-3→L+10 (23%)                                |
| 79 | 58724 | 170.29 | 0.03 | H-2→L+8 (18%), H-2→L+9 (15%), H-2→L+10 (17%), H-2→L+11 (19%) |
| 80 | 58989 | 169.52 | 0.02 | H-1→L+14 (28%), H-1→L+15 (15%), HOMO→L+17 (22%)              |
| 81 | 59096 | 169.22 | 0.01 | H-4→L+8 (19%), HOMO→L+17 (21%)                               |
| 82 | 59122 | 169.14 | 0.02 | H-10→L+1 (25%), H-8→L+2 (13%)                                |
| 83 | 59232 | 168.83 | 0.01 | H-10→L+1 (18%), H-4→L+8 (18%), HOMO→L+17 (11%)               |
| 84 | 59287 | 168.67 | 0.01 | H-3→L+9 (16%), H-3→L+10 (21%)                                |
| 85 | 59417 | 168.30 | 0.10 | H-6→L+3 (10%), H-3→L+11 (11%), H-2→L+11 (23%)                |
| 86 | 59556 | 167.91 | 0.00 | H-2→L+7 (10%), H-2→L+9 (54%), H-2→L+10 (16%)                 |

|     |       |        |      |                                                                |
|-----|-------|--------|------|----------------------------------------------------------------|
| 87  | 59660 | 167.62 | 0.00 | H-11→L+1 (33%), H-6→L+3 (28%)                                  |
| 88  | 59788 | 167.26 | 0.00 | H-1→L+13 (46%)                                                 |
| 89  | 59952 | 166.80 | 0.02 | H-6→L+3 (10%), H-4→L+9 (12%), H-4→L+10 (12%), H-4→L+11 (15%)   |
| 90  | 60011 | 166.64 | 0.09 | H-6→L+3 (19%), H-3→L+9 (25%)                                   |
| 91  | 60138 | 166.28 | 0.04 | H-3→L+9 (21%), H-3→L+10 (12%)                                  |
| 92  | 60236 | 166.02 | 0.00 | H-5→L+6 (49%)                                                  |
| 93  | 60396 | 165.57 | 0.00 | HOMO→L+18 (66%)                                                |
| 94  | 60478 | 165.35 | 0.01 | H-5→L+6 (18%), H-4→L+10 (11%), H-1→L+15 (13%)                  |
| 95  | 60617 | 164.97 | 0.04 | H-16→LUMO (17%), H-3→L+11 (12%), H-1→L+15 (10%)                |
| 96  | 60702 | 164.74 | 0.00 | H-8→L+3 (20%), H-7→L+3 (59%)                                   |
| 97  | 60753 | 164.60 | 0.00 | H-16→LUMO (18%), H-15→LUMO (10%), H-12→L+1 (16%)               |
| 98  | 60778 | 164.53 | 0.00 | H-16→LUMO (10%), H-4→L+9 (19%), H-4→L+10 (15%), H-1→L+15 (12%) |
| 99  | 60917 | 164.16 | 0.06 | H-10→L+1 (17%)                                                 |
| 100 | 61238 | 163.30 | 0.00 | HOMO→L+19 (72%)                                                |

## S5. 5-chloro-3-phenacylidene-1H-indol-2-one

## General Information

Log file : V2711-01-Z-Cl5.log

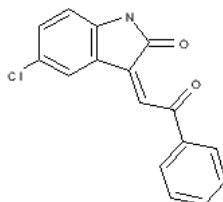

|                                   |   |                                                   |
|-----------------------------------|---|---------------------------------------------------|
| SMILES                            | : | c1ccc(cc1)C(=O)C=C2c3cc(ccc3NC2=O)Cl              |
| Formula                           | : | C <sub>16</sub> H <sub>10</sub> ClNO <sub>2</sub> |
| Charge                            | : | 0                                                 |
| Multiplicity                      | : | 1                                                 |
| Dipole                            | : | 4.9477 Debye                                      |
| Energy                            | : | -1281.36888058 a.u.                               |
| Number of imaginary frequencies : |   | 0                                                 |

## Cartesian Co-ordinates (XYZ format)

30

|   |             |             |             |
|---|-------------|-------------|-------------|
| C | 0.04157984  | -0.18501930 | 0.00523506  |
| C | -1.27003479 | 0.06415867  | -0.36732301 |
| C | -1.75016356 | 1.37584043  | -0.55493379 |
| C | -0.90562063 | 2.46241522  | -0.36653227 |
| C | 0.41167653  | 2.20495129  | 0.00888890  |
| C | 0.88919908  | 0.91020292  | 0.19458461  |
| H | 0.40915745  | -1.19328582 | 0.14796434  |
| H | 1.91907787  | 0.75122362  | 0.48583630  |
| C | -3.47459936 | -0.20822096 | -0.97071677 |
| C | -3.16071677 | 1.26943648  | -0.93922853 |
| N | -2.30430245 | -0.84371144 | -0.61643660 |
| H | -2.22212863 | -1.84819794 | -0.55887169 |
| O | -4.53235960 | -0.74279088 | -1.24917746 |
| C | -4.05417252 | 2.22385645  | -1.22521019 |
| H | -3.76017928 | 3.27030873  | -1.19630277 |
| C | -5.46098375 | 1.98920023  | -1.71828270 |
| O | -5.65306044 | 2.02373219  | -2.92186999 |
| C | -6.56599569 | 1.83576465  | -0.73541290 |
| C | -7.87589169 | 1.69022667  | -1.21549439 |
| C | -6.33525562 | 1.84953690  | 0.64607286  |
| C | -8.93504143 | 1.55557346  | -0.32809055 |
| H | -8.04096127 | 1.68410754  | -2.28572655 |
| C | -7.39923239 | 1.71737766  | 1.53432405  |
| H | -5.32762289 | 1.96327758  | 1.02694476  |

C -8.69767666 1.56924105 1.04893112  
 H -9.94524956 1.44091952 -0.70331609  
 H -7.21605110 1.72899568 2.60223508  
 H -9.52517128 1.46500933 1.74137366  
 H -1.24986351 3.47911119 -0.50557232  
 Cl 1.51006043 3.56772685 0.25615034

### TD-DFT Calculations

| No. | Energy<br>( $\text{cm}^{-1}$ ) | Wavelength<br>(nm) | Osc. Strength | Major contribs                                                               |
|-----|--------------------------------|--------------------|---------------|------------------------------------------------------------------------------|
| 1   | 25625                          | 390.24             | 0.03          | HOMO→LUMO (97%)                                                              |
| 2   | 28901                          | 346.00             | 0.01          | HOMO→L+1 (86%)                                                               |
| 3   | 31223                          | 320.28             | 0.03          | H-4→LUMO (25%), H-4→L+1 (17%), H-1→LUMO (20%), H-1→L+1 (13%), HOMO→L+1 (11%) |
| 4   | 32594                          | 306.81             | 0.03          | H-5→LUMO (12%), H-4→LUMO (15%), H-4→L+1 (22%), H-3→LUMO (20%), H-1→L+1 (16%) |
| 5   | 33932                          | 294.71             | 0.16          | H-5→LUMO (12%), H-3→LUMO (13%), H-1→LUMO (51%)                               |
| 6   | 34534                          | 289.57             | 0.01          | H-2→LUMO (92%)                                                               |
| 7   | 34731                          | 287.92             | 0.03          | H-4→LUMO (41%), H-3→LUMO (44%)                                               |
| 8   | 35824                          | 279.14             | 0.01          | H-5→LUMO (49%), H-3→LUMO (11%), H-1→L+1 (23%)                                |
| 9   | 36711                          | 272.40             | 0.01          | H-5→LUMO (17%), H-4→L+1 (32%), H-1→L+1 (30%)                                 |
| 10  | 36794                          | 271.79             | 0.02          | H-3→L+1 (31%), H-2→L+1 (56%)                                                 |
| 11  | 38551                          | 259.40             | 0.52          | H-5→L+1 (14%), H-3→L+1 (40%), H-2→L+1 (20%), HOMO→L+2 (18%)                  |
| 12  | 39915                          | 250.53             | 0.25          | HOMO→L+2 (57%)                                                               |
| 13  | 41365                          | 241.75             | 0.01          | HOMO→L+3 (86%)                                                               |
| 14  | 41419                          | 241.43             | 0.08          | H-5→L+1 (56%), HOMO→L+3 (13%)                                                |
| 15  | 43301                          | 230.94             | 0.06          | H-6→LUMO (82%)                                                               |
| 16  | 44041                          | 227.06             | 0.00          | HOMO→L+4 (27%), HOMO→L+5 (35%)                                               |
| 17  | 44747                          | 223.48             | 0.03          | HOMO→L+6 (31%), H-1→L+2 (33%), HOMO→L+4 (34%), HOMO→L+5 (19%)                |
| 18  | 45031                          | 222.07             | 0.00          | HOMO→L+5 (19%), HOMO→L+6 (15%), HOMO→L+7 (48%)                               |
| 19  | 46255                          | 216.19             | 0.00          | H-7→LUMO (95%)                                                               |
| 20  | 46832                          | 213.53             | 0.00          | H-6→L+1 (86%)                                                                |
| 21  | 47167                          | 212.01             | 0.01          | H-4→L+3 (16%), H-1→L+3 (79%)                                                 |
| 22  | 47492                          | 210.56             | 0.02          | H-4→L+2 (18%), H-1→L+2 (19%), HOMO→L+8 (19%)                                 |
| 23  | 47533                          | 210.38             | 0.01          | HOMO→L+6 (11%), HOMO→L+8 (55%)                                               |

|    |       |        |      |                                                                             |
|----|-------|--------|------|-----------------------------------------------------------------------------|
| 24 | 47726 | 209.53 | 0.00 | HOMO→L+6 (26%),<br>HOMO→L+7 (36%),<br>HOMO→L+9 (20%)                        |
| 25 | 48161 | 207.64 | 0.04 | H-8→LUMO (33%), H-3→L+2 (17%)                                               |
| 26 | 48944 | 204.31 | 0.14 | H-8→LUMO (22%), H-2→L+2 (23%), H-1→L+2 (11%)                                |
| 27 | 49107 | 203.64 | 0.19 | H-3→L+3 (37%), H-2→L+3 (14%)                                                |
| 28 | 49225 | 203.15 | 0.02 | H-3→L+2 (12%), H-2→L+2 (67%)                                                |
| 29 | 49533 | 201.88 | 0.02 | H-4→L+3 (70%), H-1→L+3 (14%)                                                |
| 30 | 49712 | 201.16 | 0.01 | HOMO→L+9 (72%)                                                              |
| 31 | 49842 | 200.63 | 0.04 | H-4→L+2 (41%), H-3→L+2 (38%)                                                |
| 32 | 50335 | 198.67 | 0.14 | H-8→L+1 (70%)                                                               |
| 33 | 50902 | 196.46 | 0.00 | H-1→L+4 (25%), H-1→L+5 (34%), H-1→L+6 (14%),<br>HOMO→L+11 (10%)             |
| 34 | 50953 | 196.26 | 0.01 | HOMO→L+11 (67%)                                                             |
| 35 | 51180 | 195.39 | 0.01 | H-7→L+1 (88%)                                                               |
| 36 | 51196 | 195.33 | 0.02 | HOMO→L+10 (78%)                                                             |
| 37 | 51487 | 194.22 | 0.07 | H-5→L+2 (53%)                                                               |
| 38 | 51577 | 193.88 | 0.01 | H-9→LUMO (32%), H-9→L+1 (49%)                                               |
| 39 | 51907 | 192.65 | 0.27 | H-3→L+3 (28%), H-2→L+3 (41%)                                                |
| 40 | 51978 | 192.39 | 0.02 | H-1→L+5 (11%), H-1→L+6 (25%), H-1→L+7 (43%)                                 |
| 41 | 52613 | 190.07 | 0.29 | H-1→L+4 (21%), H-1→L+5 (13%)                                                |
| 42 | 52655 | 189.92 | 0.07 | H-2→L+4 (31%), H-2→L+5 (25%), H-2→L+6 (15%)                                 |
| 43 | 53158 | 188.12 | 0.01 | H-5→L+3 (87%)                                                               |
| 44 | 53215 | 187.92 | 0.01 | H-3→L+4 (38%), H-3→L+5 (30%), H-3→L+6 (14%)                                 |
| 45 | 53499 | 186.92 | 0.00 | HOMO→L+13 (48%),<br>HOMO→L+14 (12%),<br>HOMO→L+15 (12%)                     |
| 46 | 53627 | 186.47 | 0.01 | HOMO→L+12 (62%)                                                             |
| 47 | 53776 | 185.96 | 0.01 | H-9→LUMO (41%), H-9→L+1 (27%)                                               |
| 48 | 53894 | 185.55 | 0.03 | H-9→LUMO (10%), H-4→L+4 (18%), H-3→L+4 (12%), H-3→L+5 (13%)                 |
| 49 | 53948 | 185.36 | 0.02 | H-4→L+5 (15%), H-1→L+6 (16%), H-1→L+7 (12%), H-1→L+8 (11%)                  |
| 50 | 54466 | 183.60 | 0.04 | H-1→L+7 (12%), H-1→L+8 (23%), HOMO→L+15 (29%)                               |
| 51 | 54552 | 183.31 | 0.04 | H-10→LUMO (41%), H-1→L+8 (18%)                                              |
| 52 | 54646 | 183.00 | 0.02 | HOMO→L+15 (21%)                                                             |
| 53 | 54744 | 182.67 | 0.00 | H-13→LUMO (20%),<br>H-12→LUMO (19%),<br>H-11→LUMO (11%),<br>HOMO→L+15 (13%) |
| 54 | 54809 | 182.45 | 0.00 | H-2→L+4 (19%), H-2→L+5 (16%), H-1→L+8 (11%)                                 |
| 55 | 54915 | 182.10 | 0.01 | H-2→L+4 (26%), H-2→L+5 (23%), HOMO→L+14 (10%)                               |



|    |       |        |      |                                                                         |
|----|-------|--------|------|-------------------------------------------------------------------------|
| 56 | 55007 | 181.79 | 0.00 | HOMO→L+13 (12%),<br>HOMO→L+14 (55%)                                     |
| 57 | 55206 | 181.14 | 0.01 | H-4→L+4 (26%), H-4→L+5<br>(11%), H-3→L+5 (10%)                          |
| 58 | 55386 | 180.55 | 0.04 | H-4→L+4 (11%), H-4→L+5<br>(29%), H-3→L+4 (19%), H-<br>3→L+5 (13%)       |
| 59 | 55635 | 179.74 | 0.01 | H-11→LUMO (12%), H-<br>11→L+1 (15%), H-1→L+9<br>(26%)                   |
| 60 | 55948 | 178.74 | 0.05 | H-6→L+2 (65%)                                                           |
| 61 | 56091 | 178.28 | 0.01 | H-2→L+5 (15%), H-2→L+6<br>(46%), H-2→L+7 (16%)                          |
| 62 | 56295 | 177.64 | 0.04 | H-3→L+5 (10%), H-3→L+6<br>(40%), H-3→L+7 (12%)                          |
| 63 | 56461 | 177.11 | 0.01 | H-13→LUMO (42%), H-<br>12→LUMO (17%), H-<br>11→LUMO (17%)               |
| 64 | 56768 | 176.16 | 0.01 | H-1→L+9 (38%), H-1→L+11<br>(16%)                                        |
| 65 | 56962 | 175.55 | 0.00 | H-7→L+2 (86%)                                                           |
| 66 | 57168 | 174.92 | 0.00 | H-4→L+6 (10%), H-1→L+10<br>(25%)                                        |
| 67 | 57338 | 174.41 | 0.01 | HOMO→L+16 (76%)                                                         |
| 68 | 57365 | 174.32 | 0.03 | H-5→L+4 (43%), H-5→L+5<br>(22%)                                         |
| 69 | 57479 | 173.98 | 0.03 | H-2→L+10 (76%)                                                          |
| 70 | 57617 | 173.56 | 0.04 | H-3→L+8 (13%), H-2→L+7<br>(11%), H-1→L+10 (25%)                         |
| 71 | 57663 | 173.42 | 0.01 | H-12→LUMO (13%), H-<br>11→LUMO (17%), H-11→L+1<br>(11%), H-1→L+11 (10%) |
| 72 | 57702 | 173.30 | 0.03 | H-12→L+1 (10%), H-3→L+6<br>(10%)                                        |
| 73 | 57846 | 172.87 | 0.00 | H-4→L+6 (17%), H-3→L+7<br>(14%), H-2→L+7 (14%)                          |
| 74 | 58033 | 172.32 | 0.01 | H-1→L+11 (13%),                                                         |
| 75 | 58109 | 172.09 | 0.02 | HOMO→L+17 (19%)                                                         |
| 76 | 58169 | 171.91 | 0.01 | HOMO→L+17 (47%)                                                         |
| 77 | 58228 | 171.74 | 0.03 | H-10→L+1 (11%), H-4→L+6<br>(17%), H-3→L+8 (10%)                         |
| 78 | 58247 | 171.68 | 0.00 | H-2→L+8 (40%), H-2→L+9<br>(12%), H-2→L+11 (11%)                         |
| 79 | 58318 | 171.47 | 0.00 | H-4→L+6 (15%), H-3→L+7<br>(14%), H-3→L+10 (22%)                         |
| 80 | 58549 | 170.80 | 0.02 | H-10→L+1 (38%), H-3→L+10<br>(32%)                                       |
| 81 | 58628 | 170.57 | 0.01 | H-10→L+1 (13%), H-3→L+10<br>(18%)                                       |
| 82 | 58811 | 170.04 | 0.01 | H-5→L+5 (13%),                                                          |
| 83 | 58873 | 169.86 | 0.05 | HOMO→L+18 (30%)                                                         |
| 84 | 58929 | 169.70 | 0.04 | H-4→L+8 (14%),                                                          |
| 85 | 59068 | 169.30 | 0.02 | HOMO→L+18 (20%)                                                         |
| 86 | 59133 | 169.11 | 0.02 | H-6→L+3 (53%), H-4→L+7<br>(21%)                                         |
| 87 | 59231 | 168.83 | 0.14 | H-6→L+3 (21%), H-4→L+7<br>(41%)                                         |
|    |       |        |      | H-4→L+8 (32%)                                                           |
|    |       |        |      | HOMO→L+18 (14%),                                                        |
|    |       |        |      | HOMO→L+19 (51%)                                                         |
|    |       |        |      | H-3→L+9 (12%), H-3→L+11<br>(20%), H-2→L+9 (12%)                         |

|     |       |        |      |                                                             |
|-----|-------|--------|------|-------------------------------------------------------------|
| 88  | 59377 | 168.41 | 0.05 | H-2→L+9 (25%), H-2→L+11 (33%)                               |
| 89  | 59578 | 167.85 | 0.01 | H-3→L+7 (11%), H-3→L+9 (32%), H-3→L+11 (23%)                |
| 90  | 59816 | 167.18 | 0.06 | H-8→L+2 (35%), H-4→L+10 (11%), H-1→L+12 (14%)               |
| 91  | 59991 | 166.69 | 0.04 | H-8→L+2 (12%), HOMO→L+19 (12%), HOMO→L+20 (40%)             |
| 92  | 60027 | 166.59 | 0.06 | H-8→L+2 (31%), H-4→L+10 (16%), H-1→L+12 (10%)               |
| 93  | 60247 | 165.98 | 0.01 | H-1→L+13 (46%)                                              |
| 94  | 60569 | 165.10 | 0.01 | H-4→L+10 (26%), H-1→L+12 (44%), H-1→L+15 (10%)              |
| 95  | 60852 | 164.33 | 0.01 | H-5→L+6 (47%), H-4→L+9 (12%)                                |
| 96  | 61018 | 163.89 | 0.01 | H-16→LUMO (12%), H-14→LUMO (41%), H-5→L+6 (10%)             |
| 97  | 61080 | 163.72 | 0.01 | H-14→LUMO (15%), H-5→L+6 (12%), H-4→L+10 (10%)              |
| 98  | 61153 | 163.52 | 0.04 | H-14→LUMO (10%), H-4→L+10 (11%), H-4→L+11 (11%)             |
| 99  | 61351 | 163.00 | 0.00 | H-13→L+1 (12%), H-6→L+4 (20%), H-6→L+5 (23%), H-5→L+8 (13%) |
| 100 | 61453 | 162.73 | 0.02 | H-13→L+1 (33%), H-5→L+8 (10%)                               |

## S6. 5-chloro-3-phenacylidene-1H-indol-2-one

## General Information

Log file : V2711-02-E-Cl5.log

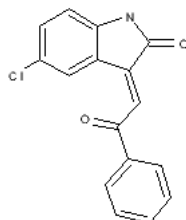

|                                   |   |                                                   |
|-----------------------------------|---|---------------------------------------------------|
| SMILES                            | : | c1ccc(cc1)C(=O)C=C2c3cc(ccc3NC2=O)Cl              |
| Formula                           | : | C <sub>16</sub> H <sub>10</sub> ClNO <sub>2</sub> |
| Charge                            | : | 0                                                 |
| Multiplicity                      | : | 1                                                 |
| Dipole                            | : | 3.0084 Debye                                      |
| Energy                            | : | -1281.37448718 a.u.                               |
| Number of imaginary frequencies : |   | 0                                                 |

## Cartesian Co-ordinates (XYZ format)

30

|   |             |             |             |
|---|-------------|-------------|-------------|
| C | 1.09890509  | 0.46393159  | 0.33268195  |
| C | 0.04457384  | 1.28343868  | -0.03394722 |
| C | -1.21035290 | 0.76176769  | -0.43136215 |
| C | -1.39729714 | -0.62087733 | -0.46309310 |
| C | -0.33221716 | -1.43549454 | -0.09067181 |
| C | 0.89915007  | -0.91839749 | 0.30203533  |
| H | 2.05419087  | 0.87354255  | 0.63493413  |
| H | 1.70357299  | -1.58611023 | 0.58149707  |
| C | -1.21212459 | 3.14179230  | -0.49326634 |
| C | -2.07146668 | 1.90231240  | -0.73309833 |
| N | 0.01297769  | 2.67744327  | -0.08139762 |
| H | 0.78415591  | 3.28627896  | 0.15043895  |
| O | -1.53567898 | 4.30472422  | -0.63311273 |
| C | -3.34845233 | 2.10555053  | -1.12148917 |
| H | -3.61770558 | 3.14976645  | -1.22935963 |
| C | -4.38574743 | 1.09771478  | -1.42813885 |
| O | -4.12705231 | -0.10085252 | -1.48817897 |
| C | -5.77877331 | 1.57675195  | -1.69751883 |
| C | -6.68051529 | 0.66761810  | -2.27364635 |
| C | -6.22858667 | 2.86650944  | -1.37642956 |
| C | -7.99175692 | 1.04057205  | -2.53531671 |
| H | -6.32965565 | -0.32843915 | -2.51143980 |
| C | -7.54788208 | 3.23485851  | -1.62788200 |

H -5.56771708 3.58605838 -0.91147524  
 C -8.42914772 2.32707191 -2.21178770  
 H -8.67517662 0.33267042 -2.98951459  
 H -7.88601255 4.23082924 -1.36752057  
 H -9.45345116 2.61883473 -2.41327906  
 H -2.34407711 -1.03164530 -0.77588671  
 Cl -0.55147296 -3.18982458 -0.12423487

### TD-DFT Calculations

| No. | Energy<br>( $\text{cm}^{-1}$ ) | Wavelength<br>(nm) | Osc. Strength | Major contribs                                                    |
|-----|--------------------------------|--------------------|---------------|-------------------------------------------------------------------|
| 1   | 19912                          | 502.22             | 0.07          | HOMO→LUMO (98%)<br>H-4→LUMO (48%), H-3→LUMO (28%), H-2→LUMO (20%) |
| 2   | 23963                          | 417.31             | 0.00          |                                                                   |
| 3   | 27914                          | 358.24             | 0.55          | H-1→LUMO (93%)                                                    |
| 4   | 28167                          | 355.02             | 0.00          | H-3→LUMO (26%), H-2→LUMO (71%)                                    |
| 5   | 29548                          | 338.43             | 0.00          | H-5→LUMO (93%)                                                    |
| 6   | 30657                          | 326.19             | 0.00          | H-4→LUMO (41%), H-3→LUMO (43%)                                    |
| 7   | 35416                          | 282.36             | 0.01          | HOMO→L+1 (93%)                                                    |
| 8   | 37462                          | 266.94             | 0.01          | H-6→LUMO (87%)                                                    |
| 9   | 39183                          | 255.21             | 0.32          | H-8→LUMO (21%),<br>HOMO→L+2 (61%)                                 |
| 10  | 39963                          | 250.23             | 0.00          | H-7→LUMO (90%)                                                    |
| 11  | 40326                          | 247.98             | 0.01          | H-4→L+1 (38%), H-3→L+1 (20%), H-2→L+1 (29%)                       |
| 12  | 41499                          | 240.97             | 0.03          | H-3→L+1 (25%), H-2→L+1 (35%), HOMO→L+3 (10%)                      |
| 13  | 42072                          | 237.69             | 0.10          | H-8→LUMO (47%), H-1→L+1 (12%), HOMO→L+3 (23%)                     |
| 14  | 42603                          | 234.72             | 0.01          | H-8→LUMO (14%),<br>HOMO→L+3 (66%)                                 |
| 15  | 43514                          | 229.81             | 0.10          | H-1→L+1 (69%), HOMO→L+2 (11%)                                     |
| 16  | 44528                          | 224.58             | 0.00          | HOMO→L+5 (62%),<br>HOMO→L+6 (30%)                                 |
| 17  | 45101                          | 221.72             | 0.16          | H-4→L+1 (41%), H-3→L+1 (24%), H-2→L+1 (13%)                       |
| 18  | 45351                          | 220.50             | 0.11          | H-1→L+2 (20%), HOMO→L+4 (67%)                                     |
| 19  | 45526                          | 219.65             | 0.00          | H-9→LUMO (65%),<br>HOMO→L+7 (22%)                                 |
| 20  | 45538                          | 219.59             | 0.00          | H-9→LUMO (29%),<br>HOMO→L+5 (12%),<br>HOMO→L+7 (48%)              |
| 21  | 47094                          | 212.34             | 0.00          | H-5→L+1 (88%)                                                     |
| 22  | 47738                          | 209.48             | 0.00          | H-4→L+2 (24%), H-3→L+2 (20%), H-2→L+2 (29%)                       |
| 23  | 47927                          | 208.65             | 0.00          | H-4→L+3 (32%), H-3→L+3 (22%), H-2→L+3 (14%)                       |
| 24  | 47998                          | 208.34             | 0.00          | HOMO→L+5 (13%),<br>HOMO→L+6 (48%),<br>HOMO→L+7 (12%)              |
| 25  | 48055                          | 208.10             | 0.00          | H-12→LUMO (36%), H-11→LUMO (35%)                                  |
| 26  | 48201                          | 207.47             | 0.08          | H-10→LUMO (53%), H-1→L+2 (26%)                                    |

|    |       |        |      |                                                                                            |
|----|-------|--------|------|--------------------------------------------------------------------------------------------|
| 27 | 48296 | 207.06 | 0.00 | HOMO→L+8 (80%)                                                                             |
| 28 | 49040 | 203.92 | 0.05 | H-12→LUMO (12%), H-2→L+2 (16%), H-1→L+3 (37%)                                              |
| 29 | 49123 | 203.57 | 0.01 | H-12→LUMO (33%), H-11→LUMO (39%), H-1→L+3 (10%)                                            |
| 30 | 49414 | 202.37 | 0.02 | H-4→L+2 (10%), H-2→L+2 (30%), H-1→L+3 (35%)                                                |
| 31 | 49526 | 201.91 | 0.05 | H-10→LUMO (22%), H-4→L+2 (15%), H-3→L+2 (14%), H-1→L+2 (27%)                               |
| 32 | 50276 | 198.90 | 0.04 | H-5→L+2 (64%)                                                                              |
| 33 | 50600 | 197.63 | 0.10 | H-5→L+2 (11%), H-4→L+2 (29%), H-3→L+2 (17%)                                                |
| 34 | 50789 | 196.89 | 0.13 | H-13→LUMO (46%), H-4→L+3 (15%), H-3→L+3 (18%)                                              |
| 35 | 50822 | 196.76 | 0.00 | HOMO→L+9 (71%)                                                                             |
| 36 | 51341 | 194.78 | 0.13 | H-13→LUMO (15%), H-4→L+3 (12%), H-3→L+2 (12%), H-2→L+3 (24%)                               |
| 37 | 51795 | 193.07 | 0.00 | H-1→L+5 (45%), HOMO→L+10 (35%)                                                             |
| 38 | 51965 | 192.44 | 0.00 | H-1→L+5 (34%), HOMO→L+10 (46%)                                                             |
| 39 | 52000 | 192.31 | 0.24 | H-6→L+1 (54%), H-1→L+4 (27%)                                                               |
| 40 | 52300 | 191.21 | 0.00 | H-2→L+5 (70%), H-2→L+6 (20%)                                                               |
| 41 | 52717 | 189.69 | 0.10 | H-13→LUMO (14%), H-2→L+4 (10%), HOMO→L+11 (25%)                                            |
| 42 | 52844 | 189.24 | 0.01 | H-3→L+5 (13%), H-1→L+6 (29%), H-1→L+7 (20%)                                                |
| 43 | 52889 | 189.07 | 0.07 | H-1→L+4 (11%), HOMO→L+11 (55%)                                                             |
| 44 | 53160 | 188.11 | 0.15 | H-6→L+1 (14%), H-4→L+4 (20%), H-3→L+4 (21%), H-2→L+4 (15%), H-1→L+4 (12%)                  |
| 45 | 53327 | 187.52 | 0.02 | H-3→L+5 (32%), H-1→L+7 (38%)                                                               |
| 46 | 53444 | 187.11 | 0.00 | H-16→LUMO (11%), H-14→LUMO (69%)                                                           |
| 47 | 53523 | 186.83 | 0.35 | H-13→LUMO (11%), H-6→L+1 (14%), H-4→L+4 (14%), H-3→L+3 (10%), H-2→L+3 (13%), H-1→L+4 (11%) |
| 48 | 54156 | 184.65 | 0.00 | H-4→L+5 (53%), H-3→L+5 (18%)                                                               |
| 49 | 54323 | 184.09 | 0.00 | HOMO→L+12 (59%)                                                                            |
| 50 | 54850 | 182.32 | 0.00 | HOMO→L+12 (13%), HOMO→L+13 (36%), HOMO→L+15 (36%)                                          |
| 51 | 54870 | 182.25 | 0.00 | H-5→L+3 (96%)                                                                              |
| 52 | 55114 | 181.44 | 0.01 | H-7→L+1 (82%)                                                                              |
| 53 | 55128 | 181.40 | 0.10 | H-4→L+4 (15%), H-2→L+4 (45%)                                                               |
| 54 | 55200 | 181.16 | 0.00 | HOMO→L+13 (22%), HOMO→L+14 (22%), HOMO→L+15 (20%)                                          |
| 55 | 55397 | 180.52 | 0.00 | H-4→L+5 (18%), H-1→L+6 (25%)                                                               |

|    |       |        |      |                                                                  |
|----|-------|--------|------|------------------------------------------------------------------|
| 56 | 55549 | 180.02 | 0.01 | H-8→L+1 (23%), H-6→L+2 (22%), H-4→L+4 (11%), H-3→L+4 (25%)       |
| 57 | 55729 | 179.44 | 0.00 | H-1→L+8 (15%), HOMO→L+13 (13%), HOMO→L+14 (41%), HOMO→L+15 (11%) |
| 58 | 55803 | 179.20 | 0.00 | H-2→L+5 (13%), H-2→L+6 (43%), H-1→L+8 (14%)                      |
| 59 | 55874 | 178.98 | 0.00 | H-2→L+6 (12%), H-1→L+8 (52%)                                     |
| 60 | 55941 | 178.76 | 0.05 | H-8→L+1 (16%), H-6→L+2 (19%), H-4→L+4 (14%), H-3→L+4 (18%)       |
| 61 | 56195 | 177.95 | 0.01 | H-5→L+4 (63%)                                                    |
| 62 | 56555 | 176.82 | 0.03 | H-3→L+6 (39%), H-1→L+9 (14%)                                     |
| 63 | 56629 | 176.59 | 0.03 | H-8→L+1 (25%), H-6→L+2 (21%)                                     |
| 64 | 56749 | 176.22 | 0.02 | H-8→L+1 (11%), H-2→L+7 (12%), H-2→L+8 (27%), H-2→L+10 (14%)      |
| 65 | 56853 | 175.89 | 0.00 | H-4→L+6 (15%), H-3→L+7 (14%), H-2→L+7 (22%), H-2→L+8 (17%)       |
| 66 | 57127 | 175.05 | 0.03 | H-16→LUMO (33%), H-5→L+5 (11%)                                   |
| 67 | 57138 | 175.01 | 0.04 | H-16→LUMO (30%), H-5→L+5 (13%), H-4→L+6 (11%)                    |
| 68 | 57409 | 174.19 | 0.00 | H-16→LUMO (13%), H-7→L+2 (66%)                                   |
| 69 | 57540 | 173.79 | 0.02 | H-5→L+5 (12%), H-4→L+6 (10%), H-3→L+6 (12%), H-3→L+8 (26%)       |
| 70 | 57654 | 173.45 | 0.01 | H-5→L+5 (18%), H-3→L+8 (15%), H-1→L+9 (17%), H-1→L+10 (18%)      |
| 71 | 57882 | 172.77 | 0.01 | H-4→L+6 (13%), H-4→L+11 (14%)                                    |
| 72 | 57985 | 172.46 | 0.00 | H-4→L+6 (15%), H-1→L+9 (19%)                                     |
| 73 | 58039 | 172.30 | 0.01 | H-9→L+1 (18%), H-3→L+7 (18%)                                     |
| 74 | 58134 | 172.02 | 0.03 | H-15→LUMO (38%), H-9→L+1 (19%), HOMO→L+16 (15%)                  |
| 75 | 58147 | 171.98 | 0.00 | H-15→LUMO (14%), H-9→L+1 (46%)                                   |
| 76 | 58213 | 171.78 | 0.01 | H-15→LUMO (18%), HOMO→L+16 (49%)                                 |
| 77 | 58333 | 171.43 | 0.01 | H-5→L+5 (11%), H-4→L+8 (33%), H-3→L+8 (11%), H-1→L+10 (18%)      |
| 78 | 58606 | 170.63 | 0.00 | H-4→L+7 (40%), H-3→L+7 (26%)                                     |
| 79 | 58751 | 170.21 | 0.00 | H-4→L+7 (17%), H-2→L+9 (58%)                                     |
| 80 | 58909 | 169.75 | 0.02 | HOMO→L+16 (12%), HOMO→L+17 (22%), HOMO→L+18 (40%)                |
| 81 | 59226 | 168.85 | 0.02 | H-4→L+8 (24%), H-1→L+10 (30%), HOMO→L+17 (12%)                   |
| 82 | 59383 | 168.40 | 0.01 | HOMO→L+17 (35%), HOMO→L+18 (19%)                                 |

|     |       |        |      |                                                                  |
|-----|-------|--------|------|------------------------------------------------------------------|
| 83  | 59462 | 168.17 | 0.04 | H-8→L+2 (47%), H-6→L+3 (20%)                                     |
| 84  | 59487 | 168.10 | 0.02 | H-2→L+8 (17%), H-2→L+10 (43%), H-1→L+11 (11%)                    |
| 85  | 59506 | 168.05 | 0.01 | H-8→L+2 (13%), H-6→L+3 (70%)                                     |
| 86  | 59567 | 167.88 | 0.02 | H-1→L+11 (51%)                                                   |
| 87  | 59643 | 167.67 | 0.00 | H-3→L+9 (50%), HOMO→L+17 (10%)                                   |
| 88  | 60098 | 166.39 | 0.00 | H-4→L+9 (18%), HOMO→L+19 (31%)                                   |
| 89  | 60240 | 166.00 | 0.00 | H-4→L+9 (31%), HOMO→L+19 (37%)                                   |
| 90  | 60278 | 165.90 | 0.00 | H-4→L+9 (15%), HOMO→L+20 (50%)                                   |
| 91  | 60408 | 165.54 | 0.02 | H-3→L+10 (43%), HOMO→L+19 (12%)                                  |
| 92  | 60416 | 165.52 | 0.03 | H-17→LUMO (25%), H-3→L+10 (15%), H-2→L+11 (10%), HOMO→L+20 (10%) |
| 93  | 60796 | 164.48 | 0.00 | H-5→L+6 (48%), H-4→L+10 (25%)                                    |
| 94  | 60865 | 164.30 | 0.15 | H-3→L+11 (24%), H-2→L+11 (32%)                                   |
| 95  | 61090 | 163.69 | 0.01 | H-5→L+6 (28%), H-4→L+10 (43%)                                    |
| 96  | 61445 | 162.75 | 0.00 | H-1→L+12 (51%)                                                   |
| 97  | 61524 | 162.54 | 0.06 | H-4→L+11 (20%), H-3→L+11 (14%), H-1→L+14 (18%)                   |
| 98  | 61648 | 162.21 | 0.01 | H-6→L+4 (61%), HOMO→L+21 (13%)                                   |
| 99  | 61682 | 162.12 | 0.03 | H-5→L+7 (39%), H-5→L+8 (16%)                                     |
| 100 | 61775 | 161.88 | 0.00 | H-6→L+5 (24%), H-6→L+6 (27%), H-6→L+7 (29%)                      |

## S7. 6-chloro-3-phenacylidene-1H-indol-2-one

## General Information

Log file : V2711-03-Z-Cl6.log

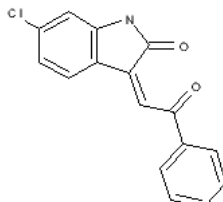

|                                   |   |                                                   |
|-----------------------------------|---|---------------------------------------------------|
| SMILES                            | : | c1ccc(cc1)C(=O)C=C2c3ccc(cc3NC2=O)Cl              |
| Formula                           | : | C <sub>16</sub> H <sub>10</sub> ClNO <sub>2</sub> |
| Charge                            | : | 0                                                 |
| Multiplicity                      | : | 1                                                 |
| Dipole                            | : | 4.4781 Debye                                      |
| Energy                            | : | -1281.36947453 a.u.                               |
| Number of imaginary frequencies : |   | 0                                                 |

## Cartesian Co-ordinates (XYZ format)

30

|   |             |             |             |
|---|-------------|-------------|-------------|
| C | 0.03373035  | -0.19507575 | 0.01105960  |
| C | -1.27388060 | 0.06496447  | -0.36770654 |
| C | -1.75315380 | 1.37737226  | -0.55882102 |
| C | -0.89929426 | 2.45521355  | -0.36594573 |
| C | 0.42430627  | 2.22360086  | 0.01599461  |
| C | 0.86143255  | 0.91390401  | 0.19594592  |
| H | 0.40042907  | -1.20189261 | 0.15713090  |
| C | -3.47458744 | -0.20741977 | -0.98066795 |
| C | -3.16138887 | 1.26982903  | -0.94681722 |
| N | -2.30434728 | -0.84353900 | -0.62019444 |
| H | -2.22200632 | -1.84804308 | -0.56219256 |
| O | -4.52853966 | -0.74534571 | -1.26499784 |
| C | -4.05562782 | 2.22425151  | -1.23257613 |
| H | -3.76062989 | 3.27040172  | -1.20222640 |
| C | -5.46319818 | 1.99193132  | -1.72305739 |
| O | -5.66061735 | 2.03024173  | -2.92578864 |
| C | -6.56552172 | 1.83539844  | -0.73687929 |
| C | -7.87635136 | 1.68577182  | -1.21316385 |
| C | -6.33126020 | 1.85185635  | 0.64396626  |
| C | -8.93287945 | 1.55032837  | -0.32274160 |
| H | -8.04414463 | 1.67701399  | -2.28293824 |
| C | -7.39264917 | 1.71938968  | 1.53531313  |
| H | -5.32276154 | 1.96839607  | 1.02169263  |
| C | -8.69205475 | 1.56771326  | 1.05365694  |



H -9.94378948 1.43243670 -0.69510669  
H -7.20671129 1.73393798 2.60271335  
H -9.51758957 1.46347451 1.74843705  
H -1.24410868 3.47245693 -0.50874990  
H 1.10512507 3.04938316 0.17077059  
Cl 2.53454161 0.63455224 0.67836642

### TD-DFT Calculations

| No. | Energy<br>(cm <sup>-1</sup> ) | Wavelength<br>(nm) | Osc. Strength | Major contribs                                                               |
|-----|-------------------------------|--------------------|---------------|------------------------------------------------------------------------------|
| 1   | 26721                         | 374.24             | 0.07          | HOMO→LUMO (94%)                                                              |
| 2   | 29082                         | 343.85             | 0.00          | HOMO→L+1 (81%)                                                               |
| 3   | 31514                         | 317.32             | 0.05          | H-4→LUMO (31%), H-4→L+1 (16%), H-1→LUMO (16%), HOMO→L+1 (14%)                |
| 4   | 32800                         | 304.87             | 0.09          | H-5→LUMO (10%), H-4→L+1 (33%), H-3→LUMO (14%), H-1→LUMO (15%), H-1→L+1 (12%) |
| 5   | 33288                         | 300.41             | 0.16          | H-5→LUMO (10%), H-4→LUMO (14%), H-3→LUMO (13%), H-1→LUMO (50%)               |
| 6   | 34707                         | 288.13             | 0.01          | H-2→LUMO (89%)                                                               |
| 7   | 34832                         | 287.09             | 0.01          | H-4→LUMO (36%), H-3→LUMO (44%)                                               |
| 8   | 35793                         | 279.39             | 0.01          | H-5→LUMO (42%), H-3→LUMO (12%), H-1→L+1 (34%)                                |
| 9   | 36349                         | 275.11             | 0.00          | H-5→LUMO (29%), H-4→L+1 (22%), H-1→L+1 (35%)                                 |
| 10  | 36873                         | 271.20             | 0.02          | H-3→L+1 (28%), H-2→L+1 (58%)                                                 |
| 11  | 38658                         | 258.68             | 0.49          | H-5→L+1 (14%), H-3→L+1 (39%), H-2→L+1 (20%)                                  |
| 12  | 39987                         | 250.08             | 0.23          | HOMO→L+2 (18%)                                                               |
| 13  | 41399                         | 241.55             | 0.08          | HOMO→L+2 (61%)                                                               |
| 14  | 41780                         | 239.35             | 0.00          | H-5→L+1 (67%)                                                                |
| 15  | 44098                         | 226.77             | 0.03          | HOMO→L+3 (98%)                                                               |
| 16  | 44675                         | 223.84             | 0.00          | H-6→LUMO (74%), HOMO→L+5 (12%)                                               |
| 17  | 45052                         | 221.97             | 0.02          | HOMO→L+4 (64%), HOMO→L+6 (26%)                                               |
| 18  | 45592                         | 219.33             | 0.00          | H-1→L+2 (47%), HOMO→L+5 (40%), HOMO→L+4 (14%), HOMO→L+6 (26%)                |
| 19  | 46037                         | 217.22             | 0.00          | HOMO→L+7 (50%)                                                               |
| 20  | 46931                         | 213.08             | 0.00          | H-6→L+1 (84%)                                                                |
| 21  | 47247                         | 211.66             | 0.02          | H-7→LUMO (95%)                                                               |
| 22  | 47674                         | 209.76             | 0.01          | H-4→L+3 (19%), H-1→L+3 (78%), H-4→L+2 (39%), H-3→L+2 (32%)                   |
| 23  | 47995                         | 208.35             | 0.00          | HOMO→L+6 (17%), HOMO→L+7 (38%), HOMO→L+8 (31%)                               |
| 24  | 48398                         | 206.62             | 0.01          | H-8→LUMO (26%), H-1→L+2 (18%), HOMO→L+5 (13%)                                |

|    |       |        |      |                                                                                     |
|----|-------|--------|------|-------------------------------------------------------------------------------------|
| 25 | 48456 | 206.37 | 0.00 | HOMO→L+6 (18%),<br>HOMO→L+8 (53%),<br>HOMO→L+9 (14%)                                |
| 26 | 48840 | 204.75 | 0.08 | H-4→L+3 (41%), H-3→L+3 (27%), H-1→L+3 (16%)                                         |
| 27 | 49031 | 203.95 | 0.07 | H-2→L+2 (69%)                                                                       |
| 28 | 49233 | 203.11 | 0.17 | H-8→LUMO (15%), H-3→L+2 (20%), H-2→L+2 (22%)                                        |
| 29 | 49342 | 202.67 | 0.20 | H-8→LUMO (12%), H-4→L+3 (26%), H-3→L+3 (15%), H-2→L+3 (12%)                         |
| 30 | 49816 | 200.74 | 0.23 | H-4→L+2 (37%), H-3→L+2 (28%)                                                        |
| 31 | 49974 | 200.11 | 0.00 | H-1→L+4 (34%), H-1→L+6 (42%)                                                        |
| 32 | 50159 | 199.37 | 0.00 | HOMO→L+9 (75%)                                                                      |
| 33 | 50955 | 196.25 | 0.00 | H-1→L+4 (36%), H-1→L+7 (41%)                                                        |
| 34 | 51012 | 196.03 | 0.11 | H-5→L+2 (52%), H-1→L+5 (14%)                                                        |
| 35 | 51286 | 194.99 | 0.04 | H-9→L+1 (17%), H-8→L+1 (43%), H-5→L+2 (15%)                                         |
| 36 | 51479 | 194.25 | 0.02 | HOMO→L+10 (13%),<br>HOMO→L+11 (58%)                                                 |
| 37 | 51591 | 193.83 | 0.02 | HOMO→L+10 (72%),<br>HOMO→L+11 (12%)                                                 |
| 38 | 51721 | 193.35 | 0.08 | H-9→LUMO (21%), H-9→L+1 (32%), H-8→L+1 (15%)                                        |
| 39 | 51936 | 192.54 | 0.12 | H-7→L+1 (45%), H-3→L+3 (14%), H-2→L+3 (19%)                                         |
| 40 | 51993 | 192.33 | 0.08 | H-7→L+1 (51%), H-3→L+3 (10%), H-2→L+3 (14%)                                         |
| 41 | 52612 | 190.07 | 0.01 | H-2→L+4 (63%), H-2→L+6 (18%)                                                        |
| 42 | 52714 | 189.70 | 0.29 | H-8→LUMO (10%), H-8→L+1 (15%), H-1→L+5 (31%)                                        |
| 43 | 53165 | 188.09 | 0.01 | H-5→L+3 (74%), H-3→L+4 (11%)                                                        |
| 44 | 53198 | 187.98 | 0.01 | H-5→L+3 (17%), H-3→L+4 (55%), H-3→L+6 (12%)                                         |
| 45 | 53304 | 187.60 | 0.01 | H-1→L+6 (11%), H-1→L+7 (34%), H-1→L+8 (20%)                                         |
| 46 | 53710 | 186.19 | 0.00 | HOMO→L+12 (66%)                                                                     |
| 47 | 53790 | 185.91 | 0.01 | H-4→L+5 (30%), H-3→L+5 (30%)                                                        |
| 48 | 53907 | 185.50 | 0.00 | H-4→L+4 (10%), H-1→L+6 (11%), H-1→L+8 (24%),<br>HOMO→L+12 (11%),<br>HOMO→L+13 (15%) |
| 49 | 53988 | 185.23 | 0.00 | H-9→LUMO (51%), H-9→L+1 (33%)                                                       |
| 50 | 54382 | 183.88 | 0.00 | H-1→L+8 (31%),<br>HOMO→L+13 (29%),<br>HOMO→L+15 (15%)                               |
| 51 | 54516 | 183.43 | 0.00 | H-4→L+4 (30%), H-4→L+9 (10%)                                                        |
| 52 | 54751 | 182.65 | 0.04 | HOMO→L+13 (32%),<br>HOMO→L+15 (41%)                                                 |
| 53 | 54871 | 182.25 | 0.00 | H-2→L+5 (67%)                                                                       |
| 54 | 54972 | 181.91 | 0.01 | H-12→L+1 (11%), H-11→LUMO (13%), H-11→L+1 (10%), H-4→L+4 (22%)                      |

|    |       |        |      |                                                                  |
|----|-------|--------|------|------------------------------------------------------------------|
| 55 | 55009 | 181.79 | 0.01 | H-13→LUMO (23%), H-12→LUMO (17%), H-11→LUMO (14%), H-2→L+5 (15%) |
| 56 | 55184 | 181.21 | 0.05 | H-10→LUMO (44%), H-3→L+5 (24%)                                   |
| 57 | 55365 | 180.62 | 0.03 | H-10→LUMO (27%), H-4→L+5 (21%), H-3→L+5 (17%)                    |
| 58 | 55664 | 179.65 | 0.01 | H-12→L+1 (11%), H-11→L+1 (11%), H-1→L+9 (31%)                    |
| 59 | 55817 | 179.16 | 0.01 | H-6→L+2 (19%), HOMO→L+14 (50%)                                   |
| 60 | 55858 | 179.02 | 0.02 | H-6→L+2 (49%), HOMO→L+14 (22%)                                   |
| 61 | 56027 | 178.49 | 0.01 | H-2→L+4 (18%), H-2→L+6 (49%), H-2→L+7 (13%)                      |
| 62 | 56247 | 177.79 | 0.04 | H-3→L+4 (12%), H-3→L+6 (45%), H-3→L+7 (14%)                      |
| 63 | 56425 | 177.23 | 0.00 | H-4→L+11 (10%), H-1→L+9 (31%), H-1→L+11 (14%)                    |
| 64 | 56633 | 176.58 | 0.00 | H-13→LUMO (47%), H-12→LUMO (16%), H-11→LUMO (22%)                |
| 65 | 56967 | 175.54 | 0.01 | H-5→L+4 (12%), H-4→L+7 (11%), H-1→L+10 (20%)                     |
| 66 | 57181 | 174.88 | 0.02 | H-5→L+5 (68%)                                                    |
| 67 | 57221 | 174.76 | 0.02 | H-4→L+6 (21%), H-1→L+10 (32%)                                    |
| 68 | 57342 | 174.39 | 0.02 | H-2→L+7 (17%), H-2→L+10 (48%)                                    |
| 69 | 57585 | 173.66 | 0.00 | H-4→L+6 (37%), H-1→L+10 (27%)                                    |
| 70 | 57646 | 173.47 | 0.01 | H-2→L+7 (37%), H-2→L+10 (30%)                                    |
| 71 | 57703 | 173.30 | 0.01 | H-7→L+2 (67%), H-1→L+11 (13%)                                    |
| 72 | 57729 | 173.22 | 0.00 | H-7→L+2 (28%), H-1→L+11 (28%)                                    |
| 73 | 57756 | 173.14 | 0.04 | HOMO→L+16 (48%)                                                  |
| 74 | 57933 | 172.61 | 0.01 | H-12→LUMO (12%), H-3→L+7 (13%), HOMO→L+16 (17%)                  |
| 75 | 57977 | 172.48 | 0.02 | H-4→L+7 (10%)                                                    |
| 76 | 58269 | 171.62 | 0.00 | H-3→L+7 (14%), H-3→L+10 (21%), H-2→L+8 (19%)                     |
| 77 | 58301 | 171.52 | 0.00 | H-5→L+4 (11%), H-4→L+7 (17%), HOMO→L+17 (21%)                    |
| 78 | 58362 | 171.34 | 0.02 | H-6→L+3 (11%), H-4→L+7 (21%), H-3→L+10 (17%), HOMO→L+17 (13%)    |
| 79 | 58372 | 171.31 | 0.03 | H-10→L+1 (25%), H-3→L+10 (17%)                                   |
| 80 | 58382 | 171.29 | 0.00 | H-6→L+3 (67%)                                                    |
| 81 | 58520 | 170.88 | 0.01 | H-10→L+1 (15%), H-3→L+10 (14%), H-2→L+8 (27%), H-2→L+11 (13%)    |
| 82 | 58595 | 170.66 | 0.01 | H-3→L+8 (42%)                                                    |
| 83 | 58700 | 170.36 | 0.01 | HOMO→L+17 (12%), HOMO→L+18 (40%)                                 |
| 84 | 58818 | 170.01 | 0.06 | H-10→L+1 (18%), H-2→L+9 (24%)                                    |
| 85 | 58993 | 169.51 | 0.05 | H-4→L+8 (18%), H-1→L+12 (16%), HOMO→L+18 (20%)                   |

|     |       |        |      |                                                               |
|-----|-------|--------|------|---------------------------------------------------------------|
| 86  | 59213 | 168.88 | 0.13 | H-11→L+1 (12%), H-3→L+9 (11%), H-3→L+11 (14%), H-1→L+12 (20%) |
| 87  | 59364 | 168.45 | 0.02 | H-4→L+8 (16%), H-3→L+9 (12%), H-3→L+11 (12%), H-1→L+12 (18%)  |
| 88  | 59440 | 168.24 | 0.02 | H-2→L+8 (19%), H-2→L+9 (19%), H-2→L+11 (24%)                  |
| 89  | 59610 | 167.76 | 0.02 | H-4→L+8 (11%), H-4→L+10 (21%), H-1→L+12 (17%), H-1→L+13 (12%) |
| 90  | 59751 | 167.36 | 0.04 | H-3→L+8 (13%), H-3→L+9 (12%), H-3→L+11 (18%), H-1→L+13 (14%)  |
| 91  | 59948 | 166.81 | 0.02 | H-1→L+15 (42%)                                                |
| 92  | 60106 | 166.37 | 0.01 | H-14→LUMO (22%), H-8→L+2 (22%)                                |
| 93  | 60213 | 166.08 | 0.01 | H-14→LUMO (59%), H-8→L+2 (10%)                                |
| 94  | 60361 | 165.67 | 0.03 | HOMO→L+19 (47%), HOMO→L+20 (24%)                              |
| 95  | 60657 | 164.86 | 0.01 | H-4→L+9 (20%), H-4→L+10 (24%), H-4→L+11 (25%)                 |
| 96  | 60790 | 164.50 | 0.02 | H-5→L+6 (63%)                                                 |
| 97  | 60902 | 164.20 | 0.00 | H-8→L+2 (18%), H-6→L+5 (10%), H-5→L+7 (10%), H-1→L+13 (15%)   |
| 98  | 61082 | 163.71 | 0.05 | H-5→L+7 (15%), H-5→L+8 (12%)                                  |
| 99  | 61117 | 163.62 | 0.03 | H-6→L+5 (15%), HOMO→L+20 (30%)                                |
| 100 | 61220 | 163.34 | 0.02 | H-6→L+5 (11%), H-5→L+7 (13%), HOMO→L+20 (19%)                 |

## S8. 6-chloro-3-phenacylidene-1H-indol-2-one

## General Information

Log file : V2711-04-E-Cl6.log

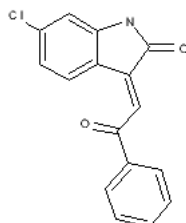

|                                   |   |                                                   |
|-----------------------------------|---|---------------------------------------------------|
| SMILES                            | : | c1ccc(cc1)C(=O)C=C2c3ccc(cc3NC2=O)Cl              |
| Formula                           | : | C <sub>16</sub> H <sub>10</sub> ClNO <sub>2</sub> |
| Charge                            | : | 0                                                 |
| Multiplicity                      | : | 1                                                 |
| Dipole                            | : | 1.7017 Debye                                      |
| Energy                            | : | -1281.37530478 a.u.                               |
| Number of imaginary frequencies : |   | 0                                                 |

## Cartesian Co-ordinates (XYZ format)

30

|   |             |             |             |
|---|-------------|-------------|-------------|
| C | 1.11671495  | 0.48853150  | 0.30611321  |
| C | 0.05453622  | 1.27983999  | -0.09584110 |
| C | -1.22178531 | 0.74531192  | -0.40345243 |
| C | -1.41469800 | -0.63334388 | -0.30347279 |
| C | -0.36040905 | -1.45242870 | 0.10127298  |
| C | 0.87523377  | -0.88347584 | 0.39668262  |
| H | 2.08642054  | 0.90609306  | 0.53971016  |
| C | -1.19317186 | 3.10958076  | -0.67217493 |
| C | -2.07592201 | 1.86825478  | -0.77311110 |
| N | 0.04120665  | 2.66296721  | -0.26273108 |
| H | 0.82873398  | 3.27666521  | -0.11359486 |
| O | -1.50299156 | 4.26163816  | -0.90115666 |
| C | -3.36404562 | 2.05938959  | -1.13361907 |
| H | -3.62379169 | 3.09450173  | -1.32193780 |
| C | -4.42364597 | 1.04681039  | -1.31686723 |
| O | -4.18390989 | -0.15712073 | -1.28893530 |
| C | -5.82055712 | 1.52479935  | -1.57149029 |
| C | -6.75339794 | 0.58983082  | -2.04771543 |
| C | -6.24327087 | 2.84030771  | -1.32796013 |
| C | -8.06908512 | 0.96183699  | -2.28833723 |
| H | -6.42330933 | -0.42573255 | -2.22536111 |
| C | -7.56665421 | 3.20861697  | -1.55739188 |
| H | -5.55698586 | 3.58116937  | -0.93935287 |

C -8.47938728 2.27415538 -2.04258823  
H -8.77696133 0.23307519 -2.66565537  
H -7.88344908 4.22527218 -1.35689843  
H -9.50700760 2.56530929 -2.22744894  
H -2.37732697 -1.05597997 -0.54662502  
H -0.49784938 -2.52205586 0.18209860  
Cl 2.19666815 -1.92990851 0.90284014

### TD-DFT Calculations

| No. | Energy<br>( $\text{cm}^{-1}$ ) | Wavelength<br>(nm) | Osc. Strength | Major contribs                                                 |
|-----|--------------------------------|--------------------|---------------|----------------------------------------------------------------|
| 1   | 21242                          | 470.76             | 0.14          | HOMO→LUMO (95%)                                                |
| 2   | 23987                          | 416.89             | 0.00          | H-4→LUMO (51%), H-3→LUMO (19%), H-2→LUMO (27%)                 |
| 3   | 27406                          | 364.88             | 0.53          | H-1→LUMO (93%)                                                 |
| 4   | 28382                          | 352.34             | 0.00          | H-3→LUMO (34%), H-2→LUMO (60%)                                 |
| 5   | 29798                          | 335.60             | 0.00          | H-5→LUMO (87%)                                                 |
| 6   | 30404                          | 328.90             | 0.02          | H-5→LUMO (10%), H-4→LUMO (35%), H-3→LUMO (40%), H-2→LUMO (12%) |
| 7   | 36582                          | 273.36             | 0.01          | HOMO→L+1 (95%)                                                 |
| 8   | 38058                          | 262.76             | 0.09          | H-6→LUMO (81%), HOMO→L+2 (14%)                                 |
| 9   | 39570                          | 252.72             | 0.21          | H-8→LUMO (14%), H-6→LUMO (12%), H-1→L+1 (10%), HOMO→L+2 (57%)  |
| 10  | 40213                          | 248.67             | 0.01          | H-4→L+1 (44%), H-3→L+1 (13%), H-2→L+1 (36%)                    |
| 11  | 41335                          | 241.93             | 0.01          | H-7→LUMO (91%)                                                 |
| 12  | 41567                          | 240.58             | 0.03          | H-3→L+1 (31%), H-2→L+1 (25%)                                   |
| 13  | 42174                          | 237.11             | 0.14          | H-8→LUMO (45%), H-1→L+1 (36%)                                  |
| 14  | 43236                          | 231.29             | 0.00          | HOMO→L+3 (83%)                                                 |
| 15  | 43512                          | 229.82             | 0.13          | H-8→LUMO (24%), H-1→L+1 (42%), HOMO→L+2 (16%)                  |
| 16  | 45055                          | 221.95             | 0.14          | H-4→L+1 (38%), H-3→L+1 (22%), H-2→L+1 (17%)                    |
| 17  | 45463                          | 219.96             | 0.00          | HOMO→L+5 (71%), HOMO→L+6 (19%)                                 |
| 18  | 45719                          | 218.73             | 0.01          | H-9→LUMO (94%)                                                 |
| 19  | 45864                          | 218.03             | 0.04          | H-1→L+2 (37%), HOMO→L+4 (53%)                                  |
| 20  | 46329                          | 215.85             | 0.00          | HOMO→L+7 (88%)                                                 |
| 21  | 47259                          | 211.60             | 0.00          | H-5→L+1 (74%)                                                  |
| 22  | 47485                          | 210.59             | 0.00          | H-5→L+1 (12%), H-4→L+2 (25%), H-3→L+2 (15%), H-2→L+2 (38%)     |
| 23  | 47698                          | 209.65             | 0.01          | H-4→L+3 (46%), H-3→L+3 (21%), H-2→L+3 (22%)                    |
| 24  | 48271                          | 207.16             | 0.00          | H-12→LUMO (44%), H-11→LUMO (45%)                               |
| 25  | 48689                          | 205.39             | 0.00          | HOMO→L+5 (16%), HOMO→L+6 (67%)                                 |
| 26  | 48719                          | 205.26             | 0.11          | H-10→LUMO (31%), H-1→L+2 (30%), HOMO→L+4 (15%)                 |

|    |       |        |      |                                                                |
|----|-------|--------|------|----------------------------------------------------------------|
| 27 | 48819 | 204.84 | 0.08 | H-1→L+3 (71%)                                                  |
| 28 | 49166 | 203.39 | 0.00 | H-4→L+2 (20%), H-3→L+2 (15%), H-2→L+2 (40%)                    |
| 29 | 49270 | 202.97 | 0.00 | HOMO→L+8 (89%)                                                 |
| 30 | 49319 | 202.76 | 0.00 | H-12→LUMO (43%), H-11→LUMO (45%)                               |
| 31 | 49622 | 201.52 | 0.01 | H-10→LUMO (20%), H-4→L+2 (23%), H-3→L+2 (39%)                  |
| 32 | 50134 | 199.46 | 0.09 | H-10→LUMO (31%), H-5→L+2 (22%), HOMO→L+4 (13%)                 |
| 33 | 50279 | 198.89 | 0.03 | H-5→L+2 (53%), H-4→L+2 (14%)                                   |
| 34 | 50702 | 197.23 | 0.00 | H-1→L+5 (30%), H-1→L+6 (13%), H-1→L+7 (44%)                    |
| 35 | 50800 | 196.85 | 0.13 | H-13→LUMO (34%), H-4→L+3 (16%), H-3→L+3 (22%)                  |
| 36 | 51269 | 195.05 | 0.17 | H-13→LUMO (24%), H-4→L+3 (10%), H-2→L+3 (23%)                  |
| 37 | 51516 | 194.12 | 0.00 | H-1→L+5 (36%), H-1→L+7 (42%)                                   |
| 38 | 51609 | 193.76 | 0.00 | HOMO→L+9 (73%)                                                 |
| 39 | 51832 | 192.93 | 0.52 | H-6→L+1 (23%), H-1→L+4 (43%)                                   |
| 40 | 52178 | 191.65 | 0.02 | H-2→L+5 (65%), H-2→L+6 (17%)                                   |
| 41 | 52310 | 191.17 | 0.08 | H-6→L+1 (40%), H-1→L+4 (21%)                                   |
| 42 | 52681 | 189.82 | 0.02 | H-14→LUMO (15%), H-2→L+4 (14%), HOMO→L+10 (36%)                |
| 43 | 52768 | 189.51 | 0.02 | H-14→LUMO (29%), HOMO→L+10 (40%)                               |
| 44 | 52795 | 189.41 | 0.03 | H-14→LUMO (39%), H-4→L+4 (11%), H-3→L+4 (10%), H-2→L+4 (18%)   |
| 45 | 52959 | 188.83 | 0.00 | H-3→L+5 (53%), H-3→L+6 (11%), H-1→L+6 (19%)                    |
| 46 | 53297 | 187.63 | 0.23 | H-13→LUMO (22%), H-4→L+4 (17%), H-3→L+3 (12%), HOMO→L+11 (19%) |
| 47 | 53827 | 185.78 | 0.01 | H-4→L+5 (39%), HOMO→L+11 (18%)                                 |
| 48 | 53910 | 185.50 | 0.03 | H-4→L+5 (15%), HOMO→L+11 (41%)                                 |
| 49 | 54600 | 183.15 | 0.00 | H-4→L+5 (18%), H-1→L+6 (32%), H-1→L+9 (10%)                    |
| 50 | 54650 | 182.98 | 0.00 | H-1→L+8 (11%), HOMO→L+13 (61%)                                 |
| 51 | 54970 | 181.92 | 0.00 | H-5→L+3 (97%)                                                  |
| 52 | 55073 | 181.58 | 0.01 | H-1→L+8 (70%), HOMO→L+13 (13%)                                 |
| 53 | 55124 | 181.41 | 0.12 | H-4→L+4 (16%), H-3→L+4 (13%), H-2→L+4 (46%)                    |
| 54 | 55373 | 180.59 | 0.01 | HOMO→L+12 (65%)                                                |
| 55 | 55399 | 180.51 | 0.10 | H-6→L+2 (44%), H-3→L+4 (22%)                                   |
| 56 | 55691 | 179.56 | 0.02 | H-2→L+6 (21%), HOMO→L+14 (37%)                                 |
| 57 | 55705 | 179.52 | 0.01 | H-2→L+6 (39%), HOMO→L+14 (11%)                                 |
| 58 | 55815 | 179.16 | 0.02 | H-6→L+2 (27%), H-4→L+4 (12%), H-3→L+4 (17%), HOMO→L+14 (20%)   |

|    |       |        |      |                                                                   |
|----|-------|--------|------|-------------------------------------------------------------------|
| 59 | 56139 | 178.13 | 0.00 | H-7→L+1 (59%), H-5→L+4 (21%)                                      |
| 60 | 56294 | 177.64 | 0.02 | H-3→L+6 (28%), H-2→L+7 (13%), H-2→L+8 (13%), H-1→L+9 (10%)        |
| 61 | 56302 | 177.61 | 0.00 | H-7→L+1 (20%), H-5→L+4 (56%)                                      |
| 62 | 56361 | 177.43 | 0.01 | H-3→L+6 (12%), H-2→L+7 (25%), H-2→L+8 (20%)                       |
| 63 | 56762 | 176.18 | 0.00 | H-3→L+6 (11%), HOMO→L+15 (59%)                                    |
| 64 | 56889 | 175.78 | 0.02 | H-5→L+5 (10%), H-4→L+6 (41%), H-1→L+9 (12%)                       |
| 65 | 57010 | 175.41 | 0.02 | H-4→L+7 (11%), H-3→L+7 (22%), H-3→L+8 (13%), H-2→L+10 (17%)       |
| 66 | 57299 | 174.52 | 0.00 | H-5→L+5 (16%), H-1→L+9 (30%)                                      |
| 67 | 57471 | 174.00 | 0.03 | H-8→L+1 (10%), H-3→L+8 (15%), H-2→L+7 (11%), H-1→L+10 (18%)       |
| 68 | 57500 | 173.91 | 0.01 | H-8→L+1 (18%), H-4→L+6 (23%), H-1→L+9 (12%)                       |
| 69 | 57642 | 173.49 | 0.01 | H-16→LUMO (67%)                                                   |
| 70 | 57686 | 173.35 | 0.06 | H-16→LUMO (11%), H-8→L+1 (24%), H-5→L+5 (11%), H-2→L+7 (13%)      |
| 71 | 57869 | 172.80 | 0.00 | H-4→L+11 (25%), H-2→L+11 (16%)                                    |
| 72 | 58030 | 172.32 | 0.01 | H-5→L+5 (14%), H-4→L+7 (14%), H-2→L+7 (16%)                       |
| 73 | 58222 | 171.76 | 0.00 | H-9→L+1 (79%)                                                     |
| 74 | 58362 | 171.34 | 0.03 | H-2→L+9 (11%), HOMO→L+16 (25%), HOMO→L+17 (19%)                   |
| 75 | 58418 | 171.18 | 0.01 | H-2→L+9 (54%)                                                     |
| 76 | 58460 | 171.06 | 0.01 | H-4→L+7 (10%), H-3→L+7 (40%), H-1→L+10 (17%)                      |
| 77 | 58534 | 170.84 | 0.02 | H-4→L+7 (16%), H-3→L+8 (15%), H-1→L+10 (22%)                      |
| 78 | 58673 | 170.44 | 0.00 | H-7→L+1 (12%), H-7→L+2 (78%)                                      |
| 79 | 58701 | 170.36 | 0.00 | H-6→L+3 (71%), H-1→L+11 (10%)                                     |
| 80 | 58829 | 169.98 | 0.02 | H-15→LUMO (21%), H-6→L+3 (21%), H-1→L+11 (25%)                    |
| 81 | 59047 | 169.36 | 0.00 | H-15→LUMO (13%), H-4→L+7 (10%), H-4→L+8 (17%)                     |
| 82 | 59189 | 168.95 | 0.00 | H-3→L+9 (56%)                                                     |
| 83 | 59210 | 168.89 | 0.01 | H-15→LUMO (10%), H-1→L+11 (10%), HOMO→L+16 (19%), HOMO→L+17 (34%) |
| 84 | 59260 | 168.75 | 0.00 | H-15→LUMO (16%), H-1→L+11 (30%), HOMO→L+16 (15%), HOMO→L+17 (16%) |
| 85 | 59373 | 168.43 | 0.00 | H-4→L+8 (19%), H-2→L+8 (22%), H-2→L+10 (36%)                      |
| 86 | 59887 | 166.98 | 0.01 | H-4→L+9 (58%)                                                     |
| 87 | 60110 | 166.36 | 0.00 | H-3→L+8 (26%), H-3→L+10 (53%)                                     |
| 88 | 60182 | 166.16 | 0.01 | H-4→L+9 (11%), H-1→L+13 (17%), HOMO→L+18 (48%)                    |



|     |       |        |      |                                                                      |
|-----|-------|--------|------|----------------------------------------------------------------------|
| 89  | 60367 | 165.65 | 0.00 | H-1→L+13 (50%),<br>HOMO→L+18 (27%)                                   |
| 90  | 60411 | 165.53 | 0.02 | H-17→LUMO (22%), H-8→L+2<br>(17%), H-6→L+4 (10%), H-<br>2→L+11 (10%) |
| 91  | 60498 | 165.30 | 0.04 | H-17→LUMO (17%), H-8→L+2<br>(20%), H-6→L+4 (17%)                     |
| 92  | 60640 | 164.91 | 0.00 | H-4→L+10 (57%)                                                       |
| 93  | 60884 | 164.25 | 0.09 | H-3→L+11 (22%), H-2→L+11<br>(14%)                                    |
| 94  | 60991 | 163.96 | 0.02 | H-1→L+12 (48%)                                                       |
| 95  | 61019 | 163.88 | 0.08 | H-6→L+4 (14%), H-5→L+6<br>(31%)                                      |
| 96  | 61213 | 163.36 | 0.02 | H-6→L+4 (26%), H-5→L+6<br>(25%), H-1→L+14 (21%)                      |
| 97  | 61362 | 162.97 | 0.05 | H-5→L+7 (63%)                                                        |
| 98  | 61504 | 162.59 | 0.05 | H-4→L+11 (15%), H-2→L+14<br>(14%)                                    |
| 99  | 61568 | 162.42 | 0.01 | H-6→L+7 (12%),<br>HOMO→L+19 (51%)                                    |
| 100 | 61766 | 161.90 | 0.01 | H-6→L+5 (12%), H-1→L+14<br>(32%)                                     |

## S9. 7-chloro-3-phenacylidene-1H-indol-2-one

## General Information

Log file : V2711-05-Z-Cl7.log

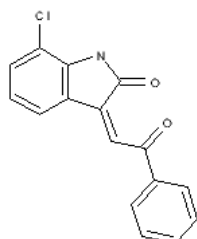

|                                   |   |                                                   |
|-----------------------------------|---|---------------------------------------------------|
| SMILES                            | : | c1ccc(cc1)C(=O)C=C2c3cccc(c3NC2=O)Cl              |
| Formula                           | : | C <sub>16</sub> H <sub>10</sub> ClNO <sub>2</sub> |
| Charge                            | : | 0                                                 |
| Multiplicity                      | : | 1                                                 |
| Dipole                            | : | 5.7710 Debye                                      |
| Energy                            | : | -1281.36754233 a.u.                               |
| Number of imaginary frequencies : |   | 0                                                 |

## Cartesian Co-ordinates (XYZ format)

30

|   |             |             |             |
|---|-------------|-------------|-------------|
| C | 0.03438716  | -0.16961837 | 0.00327386  |
| C | -1.27880192 | 0.05769306  | -0.37432337 |
| C | -1.75299895 | 1.37335348  | -0.55749589 |
| C | -0.90631258 | 2.45620966  | -0.35979268 |
| C | 0.41706452  | 2.21855927  | 0.02078270  |
| C | 0.88614923  | 0.91793281  | 0.20151378  |
| C | -3.47609878 | -0.21534431 | -0.98217797 |
| C | -3.16294312 | 1.26107478  | -0.94576174 |
| N | -2.30329490 | -0.85276353 | -0.62762052 |
| H | -2.21512628 | -1.85693693 | -0.57183295 |
| O | -4.52976799 | -0.75413221 | -1.26333356 |
| C | -4.05584383 | 2.21624851  | -1.23183095 |
| H | -3.75988865 | 3.26206231  | -1.20137489 |
| C | -5.46364212 | 1.98439646  | -1.72306538 |
| O | -5.65802288 | 2.01653337  | -2.92628980 |
| C | -6.56672430 | 1.83515739  | -0.73716027 |
| C | -7.87805319 | 1.68916857  | -1.21330440 |
| C | -6.33227205 | 1.85289538  | 0.64371049  |
| C | -8.93478680 | 1.55783510  | -0.32257101 |
| H | -8.04626465 | 1.67976749  | -2.28299713 |
| C | -7.39390707 | 1.72435868  | 1.53526032  |
| H | -5.32351303 | 1.96684074  | 1.02156675  |
| C | -8.69372559 | 1.57568967  | 1.05379009  |

H -9.94606495 1.44248152 -0.69467449  
H -7.20777512 1.73929083 2.60260725  
H -9.51946545 1.47411644 1.74871314  
H -1.26125789 3.47050118 -0.49753091  
H 1.09242821 3.04995227 0.17900881  
H 1.91227221 0.74031419 0.49645939  
Cl 0.61365837 -1.81537843 0.22869709

### TD-DFT Calculations

| No. | Energy<br>( $\text{cm}^{-1}$ ) | Wavelength<br>(nm) | Osc. Strength | Major contribs                                                 |
|-----|--------------------------------|--------------------|---------------|----------------------------------------------------------------|
| 1   | 26638                          | 375.40             | 0.04          | HOMO→LUMO (95%)                                                |
| 2   | 29526                          | 338.69             | 0.02          | HOMO→L+1 (66%)                                                 |
| 3   | 31374                          | 318.74             | 0.06          | H-4→LUMO (24%), H-4→L+1 (10%), H-1→LUMO (24%), HOMO→L+1 (28%)  |
| 4   | 32418                          | 308.47             | 0.14          | H-4→L+1 (33%), H-1→LUMO (37%), H-1→L+1 (15%)                   |
| 5   | 32882                          | 304.12             | 0.03          | H-5→LUMO (14%), H-4→LUMO (31%), H-3→LUMO (20%), H-1→LUMO (21%) |
| 6   | 34390                          | 290.78             | 0.00          | H-4→LUMO (24%), H-3→LUMO (17%), H-2→LUMO (34%), H-1→L+1 (16%)  |
| 7   | 34529                          | 289.61             | 0.01          | H-3→LUMO (25%), H-2→LUMO (60%)                                 |
| 8   | 35064                          | 285.19             | 0.01          | H-4→L+1 (22%), H-3→LUMO (16%), H-1→L+1 (41%)                   |
| 9   | 36031                          | 277.54             | 0.00          | H-5→LUMO (62%), H-4→L+1 (13%)                                  |
| 10  | 36754                          | 272.08             | 0.03          | H-3→L+1 (26%), H-2→L+1 (62%)                                   |
| 11  | 38816                          | 257.63             | 0.40          | H-5→L+1 (15%), H-3→L+1 (51%), H-2→L+1 (21%)                    |
| 12  | 40878                          | 244.63             | 0.27          | HOMO→L+2 (73%)                                                 |
| 13  | 41517                          | 240.87             | 0.08          | H-5→L+1 (72%)                                                  |
| 14  | 42417                          | 235.75             | 0.01          | HOMO→L+3 (98%)                                                 |
| 15  | 44593                          | 224.25             | 0.00          | HOMO→L+4 (36%), HOMO→L+6 (53%)                                 |
| 16  | 44969                          | 222.38             | 0.08          | H-1→L+2 (57%), HOMO→L+5 (33%)                                  |
| 17  | 45617                          | 219.21             | 0.01          | HOMO→L+4 (43%), HOMO→L+6 (34%), HOMO→L+7 (12%)                 |
| 18  | 45871                          | 218.00             | 0.13          | H-6→LUMO (71%)                                                 |
| 19  | 46345                          | 215.77             | 0.01          | H-1→L+3 (89%)                                                  |
| 20  | 47035                          | 212.61             | 0.05          | H-8→LUMO (32%), H-6→L+1 (33%), H-1→L+2 (12%), HOMO→L+5 (15%)   |
| 21  | 47613                          | 210.03             | 0.02          | H-7→LUMO (77%), H-6→L+1 (13%)                                  |
| 22  | 47722                          | 209.55             | 0.10          | H-7→LUMO (18%), H-6→L+1 (40%)                                  |
| 23  | 48286                          | 207.10             | 0.00          | H-4→L+2 (27%), H-3→L+2 (20%), H-1→L+6 (20%)                    |
| 24  | 48376                          | 206.71             | 0.00          | H-4→L+2 (14%), H-3→L+2 (11%), H-1→L+4 (13%), H-1→L+6 (38%)     |

|    |       |        |      |                                                                            |
|----|-------|--------|------|----------------------------------------------------------------------------|
| 25 | 48673 | 205.45 | 0.01 | H-1→L+6 (13%), HOMO→L+7 (43%), HOMO→L+8 (17%)                              |
| 26 | 48769 | 205.05 | 0.01 | H-4→L+3 (72%), H-3→L+3 (12%)                                               |
| 27 | 49208 | 203.22 | 0.11 | H-4→L+3 (14%), H-3→L+3 (32%), H-2→L+3 (23%)                                |
| 28 | 49453 | 202.21 | 0.00 | H-1→L+4 (42%), HOMO→L+7 (21%)                                              |
| 29 | 49612 | 201.57 | 0.01 | H-2→L+2 (91%)                                                              |
| 30 | 49817 | 200.73 | 0.00 | H-1→L+4 (13%), H-1→L+6 (10%), HOMO→L+8 (40%), HOMO→L+10 (25%)              |
| 31 | 49968 | 200.13 | 0.04 | H-8→LUMO (10%), H-4→L+2 (25%), H-3→L+2 (49%)                               |
| 32 | 50392 | 198.44 | 0.14 | H-8→LUMO (12%), H-5→L+2 (10%), H-4→L+2 (12%), H-3→L+2 (10%), H-1→L+5 (22%) |
| 33 | 50812 | 196.80 | 0.42 | H-8→LUMO (16%), H-1→L+5 (34%)                                              |
| 34 | 51125 | 195.60 | 0.03 | HOMO→L+8 (27%), HOMO→L+10 (33%), HOMO→L+11 (19%)                           |
| 35 | 51463 | 194.31 | 0.02 | H-9→LUMO (31%), H-9→L+1 (47%)                                              |
| 36 | 51760 | 193.20 | 0.19 | H-8→L+1 (23%), H-3→L+3 (16%), H-2→L+3 (26%)                                |
| 37 | 51935 | 192.55 | 0.07 | H-5→L+2 (42%), H-2→L+3 (12%)                                               |
| 38 | 52019 | 192.24 | 0.02 | HOMO→L+9 (17%), HOMO→L+11 (46%)                                            |
| 39 | 52188 | 191.61 | 0.03 | HOMO→L+9 (55%), HOMO→L+11 (15%)                                            |
| 40 | 52389 | 190.88 | 0.09 | H-8→L+1 (49%), H-5→L+2 (10%)                                               |
| 41 | 52551 | 190.29 | 0.01 | H-1→L+7 (46%), H-1→L+8 (17%), HOMO→L+9 (10%)                               |
| 42 | 52655 | 189.92 | 0.01 | H-2→L+4 (64%), H-2→L+7 (22%)                                               |
| 43 | 52688 | 189.80 | 0.01 | H-7→L+1 (91%)                                                              |
| 44 | 53252 | 187.79 | 0.01 | H-3→L+4 (67%), H-3→L+7 (18%)                                               |
| 45 | 53399 | 187.27 | 0.01 | H-5→L+3 (91%)                                                              |
| 46 | 53561 | 186.70 | 0.00 | H-1→L+7 (15%), H-1→L+8 (44%), H-1→L+10 (24%)                               |
| 47 | 53704 | 186.21 | 0.04 | H-9→LUMO (56%), H-9→L+1 (26%)                                              |
| 48 | 53944 | 185.38 | 0.06 | H-10→LUMO (38%), H-4→L+5 (19%), H-3→L+5 (12%)                              |
| 49 | 54119 | 184.78 | 0.03 | H-10→LUMO (14%), H-4→L+4 (20%), H-4→L+5 (10%), H-3→L+5 (18%)               |
| 50 | 54379 | 183.89 | 0.08 | H-10→LUMO (19%), H-4→L+4 (14%), H-1→L+11 (10%)                             |
| 51 | 54424 | 183.74 | 0.00 | HOMO→L+12 (53%), HOMO→L+14 (15%), HOMO→L+15 (17%)                          |
| 52 | 54761 | 182.61 | 0.01 | H-13→LUMO (24%), H-11→LUMO (39%)                                           |
| 53 | 54806 | 182.46 | 0.01 | H-4→L+4 (31%)                                                              |
| 54 | 54937 | 182.03 | 0.00 | H-2→L+5 (78%)                                                              |
| 55 | 55142 | 181.35 | 0.00 | HOMO→L+12 (18%), HOMO→L+13 (14%), HOMO→L+15 (33%)                          |

|    |       |        |      |                                                                |
|----|-------|--------|------|----------------------------------------------------------------|
| 56 | 55253 | 180.98 | 0.00 | H-12→LUMO (11%), H-12→L+1 (16%), H-1→L+8 (12%), H-1→L+10 (27%) |
| 57 | 55330 | 180.73 | 0.01 | H-4→L+5 (29%), H-3→L+5 (43%), HOMO→L+13 (12%)                  |
| 58 | 55446 | 180.36 | 0.00 | HOMO→L+13 (48%)                                                |
| 59 | 55789 | 179.25 | 0.00 | H-1→L+10 (18%), H-1→L+11 (32%)                                 |
| 60 | 55887 | 178.93 | 0.01 | H-2→L+4 (18%), H-2→L+6 (24%), H-2→L+7 (33%)                    |
| 61 | 55970 | 178.67 | 0.02 | H-3→L+6 (23%), H-3→L+7 (14%), H-1→L+9 (13%)                    |
| 62 | 56200 | 177.94 | 0.01 | HOMO→L+14 (39%), HOMO→L+15 (13%)                               |
| 63 | 56265 | 177.73 | 0.00 | H-1→L+9 (51%), HOMO→L+14 (13%)                                 |
| 64 | 56383 | 177.36 | 0.00 | H-13→LUMO (43%), H-11→LUMO (21%), H-2→L+6 (10%)                |
| 65 | 56469 | 177.09 | 0.00 | H-2→L+6 (49%), H-2→L+7 (22%)                                   |
| 66 | 56571 | 176.77 | 0.01 | H-4→L+6 (17%), H-3→L+6 (18%), H-3→L+7 (33%)                    |
| 67 | 56879 | 175.81 | 0.00 | H-4→L+8 (17%), H-4→L+11 (22%), H-1→L+11 (26%)                  |
| 68 | 56987 | 175.48 | 0.01 | H-4→L+6 (47%), H-3→L+6 (33%)                                   |
| 69 | 57297 | 174.53 | 0.05 | H-6→L+2 (27%), H-5→L+5 (46%)                                   |
| 70 | 57494 | 173.93 | 0.01 | H-2→L+9 (61%)                                                  |
| 71 | 57538 | 173.80 | 0.01 | H-10→L+1 (37%), H-2→L+9 (19%)                                  |
| 72 | 57657 | 173.44 | 0.02 | H-12→LUMO (16%), H-12→L+1 (14%), H-6→L+2 (27%), H-5→L+5 (13%)  |
| 73 | 57731 | 173.22 | 0.02 | H-5→L+4 (13%), H-4→L+7 (43%)                                   |
| 74 | 57831 | 172.92 | 0.03 | H-12→LUMO (10%), H-12→L+1 (14%), H-10→L+1 (34%), H-6→L+2 (15%) |
| 75 | 58229 | 171.74 | 0.01 | H-5→L+4 (29%), H-3→L+9 (30%)                                   |
| 76 | 58242 | 171.70 | 0.03 | H-5→L+4 (23%), H-4→L+7 (17%), H-3→L+9 (18%)                    |
| 77 | 58333 | 171.43 | 0.00 | H-7→L+2 (20%), H-1→L+12 (46%)                                  |
| 78 | 58371 | 171.32 | 0.00 | H-7→L+2 (73%), H-1→L+12 (14%)                                  |
| 79 | 58510 | 170.91 | 0.01 | HOMO→L+16 (48%)                                                |
| 80 | 58561 | 170.76 | 0.04 | H-3→L+9 (22%), H-2→L+8 (13%), HOMO→L+16 (18%)                  |
| 81 | 58847 | 169.93 | 0.00 | H-3→L+8 (12%), H-2→L+8 (26%), H-2→L+11 (31%)                   |
| 82 | 58898 | 169.78 | 0.06 | H-3→L+8 (16%), H-2→L+11 (17%), H-1→L+13 (10%), H-1→L+15 (13%)  |
| 83 | 59012 | 169.46 | 0.06 | H-3→L+8 (18%), H-1→L+15 (32%)                                  |
| 84 | 59202 | 168.91 | 0.14 | H-11→L+1 (10%), H-3→L+11 (43%)                                 |
| 85 | 59293 | 168.65 | 0.01 | H-1→L+13 (30%), H-1→L+15 (17%)                                 |
| 86 | 59326 | 168.56 | 0.01 | H-14→LUMO (79%)                                                |

|     |       |        |      |                                                                |
|-----|-------|--------|------|----------------------------------------------------------------|
| 87  | 59562 | 167.89 | 0.04 | H-4→L+8 (20%), H-4→L+9 (14%), H-4→L+11 (16%)                   |
| 88  | 59744 | 167.38 | 0.03 | H-1→L+14 (16%), HOMO→L+17 (12%), HOMO→L+18 (27%)               |
| 89  | 59858 | 167.06 | 0.01 | H-6→L+3 (10%), HOMO→L+17 (63%)                                 |
| 90  | 59902 | 166.94 | 0.00 | H-6→L+3 (82%)                                                  |
| 91  | 59950 | 166.81 | 0.01 | H-3→L+10 (11%), H-2→L+10 (45%)                                 |
| 92  | 60040 | 166.56 | 0.01 | H-4→L+9 (10%), H-3→L+10 (20%), H-2→L+10 (19%), HOMO→L+18 (14%) |
| 93  | 60084 | 166.43 | 0.03 | H-5→L+6 (68%)                                                  |
| 94  | 60191 | 166.14 | 0.01 | H-1→L+14 (30%), H-1→L+15 (12%), HOMO→L+18 (15%)                |
| 95  | 60361 | 165.67 | 0.00 | H-4→L+9 (28%), H-3→L+10 (26%)                                  |
| 96  | 60612 | 164.98 | 0.02 | HOMO→L+19 (63%), HOMO→L+20 (17%)                               |
| 97  | 61134 | 163.58 | 0.03 | H-4→L+10 (50%)                                                 |
| 98  | 61249 | 163.27 | 0.02 | H-13→L+1 (39%), H-11→L+1 (12%), H-4→L+10 (10%)                 |
| 99  | 61446 | 162.74 | 0.04 | H-8→L+2 (55%)                                                  |
| 100 | 61551 | 162.47 | 0.00 | H-5→L+7 (75%)                                                  |

**S10.** 7-chloro-3-phenacylidene-1H-indol-2-one

**General Information**

Log file : V2711-06-E-Cl7.log

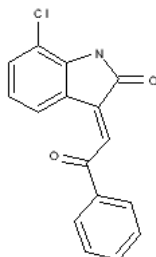

|                                   |   |                                                   |
|-----------------------------------|---|---------------------------------------------------|
| SMILES                            | : | c1ccc(cc1)C(=O)C=C2c3cccc(c3NC2=O)Cl              |
| Formula                           | : | C <sub>16</sub> H <sub>10</sub> ClNO <sub>2</sub> |
| Charge                            | : | 0                                                 |
| Multiplicity                      | : | 1                                                 |
| Dipole                            | : | 1.5606 Debye                                      |
| Energy                            | : | -1281.37266045 a.u.                               |
| Number of imaginary frequencies : |   | 0                                                 |

**Cartesian Co-ordinates (XYZ format)**

30

|   |             |             |             |
|---|-------------|-------------|-------------|
| C | 1.09934938  | 0.47816724  | 0.29921222  |
| C | 0.05285746  | 1.28965366  | -0.10222767 |
| C | -1.22108066 | 0.74277860  | -0.39937460 |
| C | -1.41725802 | -0.63411379 | -0.28875560 |
| C | -0.35506269 | -1.44283187 | 0.12033366  |
| C | 0.89327723  | -0.89737928 | 0.41250271  |
| C | -1.19685662 | 3.10962033  | -0.68808091 |
| C | -2.07675695 | 1.86623323  | -0.77683359 |
| N | 0.04057624  | 2.66877484  | -0.27848923 |
| H | 0.83005470  | 3.28120708  | -0.13407362 |
| O | -1.50844908 | 4.25911236  | -0.92469221 |
| C | -3.36465240 | 2.05360484  | -1.13704813 |
| H | -3.62271762 | 3.08777881  | -1.33327889 |
| C | -4.42856264 | 1.04182768  | -1.31318963 |
| O | -4.19149256 | -0.16178723 | -1.27926350 |
| C | -5.82347298 | 1.52342069  | -1.56939626 |
| C | -6.75983953 | 0.58882684  | -2.03969145 |
| C | -6.24113512 | 2.84209943  | -1.33413565 |
| C | -8.07397747 | 0.96431202  | -2.28279161 |
| H | -6.43348980 | -0.42901447 | -2.21111250 |
| C | -7.56310129 | 3.21382499  | -1.56590188 |
| H | -5.55239487 | 3.58317280  | -0.95042264 |

C -8.47920513 2.27979112 -2.04543304  
 H -8.78459263 0.23599544 -2.65570331  
 H -7.87603378 4.23292971 -1.37194610  
 H -9.50562000 2.57372236 -2.23252892  
 H -2.38202357 -1.05386305 -0.52676713  
 H -0.49685511 -2.51255608 0.20995866  
 H 1.71231472 -1.53191113 0.72612846  
 Cl 2.67066526 1.18126833 0.65995914

### TD-DFT Calculations

| No. | Energy<br>( $\text{cm}^{-1}$ ) | Wavelength<br>(nm) | Osc. Strength | Major contribs                                                    |
|-----|--------------------------------|--------------------|---------------|-------------------------------------------------------------------|
| 1   | 20970                          | 476.88             | 0.06          | HOMO→LUMO (98%)<br>H-4→LUMO (55%), H-3→LUMO (17%), H-2→LUMO (24%) |
| 2   | 23843                          | 419.42             | 0.00          | H-1→LUMO (95%)<br>H-3→LUMO (32%), H-2→LUMO (63%)                  |
| 3   | 26637                          | 375.41             | 0.48          | H-5→LUMO (76%), H-3→LUMO (10%)                                    |
| 4   | 28146                          | 355.29             | 0.00          | H-5→LUMO (20%), H-4→LUMO (26%), H-3→LUMO (39%), H-2→LUMO (11%)    |
| 5   | 29723                          | 336.44             | 0.00          | HOMO→L+1 (97%)<br>H-6→LUMO (64%), HOMO→L+2 (24%)                  |
| 6   | 30175                          | 331.40             | 0.04          | H-4→L+1 (48%), H-3→L+1 (12%), H-2→L+1 (34%)                       |
| 7   | 36696                          | 272.51             | 0.01          | H-6→LUMO (25%), H-1→L+1 (47%), HOMO→L+2 (17%)                     |
| 8   | 38995                          | 256.44             | 0.31          | H-3→L+1 (36%), H-2→L+1 (30%)                                      |
| 9   | 40238                          | 248.52             | 0.01          | H-7→LUMO (99%)<br>H-8→LUMO (54%), H-1→L+1 (20%), HOMO→L+2 (10%)   |
| 10  | 40661                          | 245.94             | 0.02          | H-8→LUMO (36%), H-1→L+1 (22%), HOMO→L+2 (26%)                     |
| 11  | 41615                          | 240.30             | 0.02          | HOMO→L+3 (92%)<br>HOMO→L+5 (24%), HOMO→L+6 (64%)                  |
| 12  | 41967                          | 238.28             | 0.00          | H-4→L+1 (35%), H-3→L+1 (27%), H-2→L+1 (17%)                       |
| 13  | 42587                          | 234.81             | 0.22          | H-9→LUMO (92%)<br>H-1→L+2 (49%), HOMO→L+4 (33%)                   |
| 14  | 42715                          | 234.11             | 0.04          | HOMO→L+5 (55%), HOMO→L+6 (12%), HOMO→L+7 (26%)                    |
| 15  | 43624                          | 229.23             | 0.00          | H-10→LUMO (27%), H-5→L+1 (50%)                                    |
| 16  | 44861                          | 222.91             | 0.00          | H-10→LUMO (37%), H-5→L+1 (34%), H-1→L+3 (11%)                     |
| 17  | 44885                          | 222.79             | 0.12          | H-4→L+3 (11%), H-3→L+3 (13%), H-1→L+3 (53%)                       |
| 18  | 45517                          | 219.70             | 0.01          | H-10→LUMO (13%), H-4→L+3 (35%), H-1→L+3 (20%)                     |
| 19  | 45726                          | 218.69             | 0.07          |                                                                   |
| 20  | 46054                          | 217.14             | 0.01          |                                                                   |
| 21  | 47317                          | 211.34             | 0.01          |                                                                   |
| 22  | 47456                          | 210.72             | 0.00          |                                                                   |
| 23  | 47754                          | 209.41             | 0.01          |                                                                   |
| 24  | 47832                          | 209.06             | 0.03          |                                                                   |



|    |       |        |      |                                                                               |
|----|-------|--------|------|-------------------------------------------------------------------------------|
| 25 | 48048 | 208.13 | 0.00 | H-12→LUMO (19%), H-11→LUMO (31%), H-4→L+2 (13%), H-2→L+2 (16%)                |
| 26 | 48209 | 207.43 | 0.00 | H-12→LUMO (18%), H-11→LUMO (22%), H-4→L+2 (17%), H-3→L+2 (10%), H-2→L+2 (26%) |
| 27 | 49049 | 203.88 | 0.00 | H-1→L+5 (13%), HOMO→L+5 (10%), HOMO→L+7 (50%)                                 |
| 28 | 49120 | 203.58 | 0.00 | H-12→LUMO (38%), H-11→LUMO (29%), H-1→L+6 (15%)                               |
| 29 | 49161 | 203.41 | 0.00 | H-12→LUMO (16%), H-1→L+6 (42%)                                                |
| 30 | 49518 | 201.95 | 0.24 | H-1→L+2 (32%), HOMO→L+4 (37%)                                                 |
| 31 | 49639 | 201.45 | 0.02 | H-4→L+2 (25%), H-3→L+2 (12%), H-2→L+2 (44%)                                   |
| 32 | 50335 | 198.67 | 0.02 | H-1→L+5 (20%), HOMO→L+8 (38%), HOMO→L+10 (15%)                                |
| 33 | 50356 | 198.59 | 0.11 | H-5→L+2 (11%), H-4→L+2 (12%), H-3→L+2 (29%)                                   |
| 34 | 50454 | 198.20 | 0.00 | H-1→L+5 (40%), H-1→L+7 (17%), HOMO→L+8 (16%)                                  |
| 35 | 50716 | 197.17 | 0.04 | H-13→LUMO (19%), H-5→L+2 (34%), H-4→L+2 (10%), H-3→L+3 (10%)                  |
| 36 | 50754 | 197.03 | 0.16 | H-13→LUMO (23%), H-5→L+2 (22%), H-3→L+3 (11%)                                 |
| 37 | 51226 | 195.21 | 0.04 | H-13→LUMO (16%), H-3→L+2 (12%), H-2→L+3 (10%), H-1→L+4 (33%)                  |
| 38 | 51443 | 194.39 | 0.56 | H-4→L+3 (10%), H-2→L+3 (15%), H-1→L+4 (30%)                                   |
| 39 | 52136 | 191.81 | 0.00 | H-2→L+5 (14%), HOMO→L+9 (41%)                                                 |
| 40 | 52281 | 191.27 | 0.00 | H-2→L+5 (45%), H-2→L+6 (13%), H-2→L+7 (10%), HOMO→L+9 (14%)                   |
| 41 | 52394 | 190.86 | 0.00 | H-14→LUMO (74%), H-5→L+2 (10%)                                                |
| 42 | 52676 | 189.84 | 0.07 | H-3→L+5 (13%), H-1→L+7 (21%)                                                  |
| 43 | 52752 | 189.57 | 0.07 | H-3→L+4 (10%), H-2→L+4 (12%), H-1→L+7 (16%)                                   |
| 44 | 53097 | 188.33 | 0.12 | H-6→L+1 (13%), H-4→L+4 (35%), H-2→L+4 (15%)                                   |
| 45 | 53265 | 187.74 | 0.00 | HOMO→L+8 (15%), HOMO→L+9 (17%), HOMO→L+10 (49%)                               |
| 46 | 53685 | 186.27 | 0.00 | H-3→L+5 (38%), H-1→L+7 (16%)                                                  |
| 47 | 53845 | 185.72 | 0.04 | H-6→L+1 (35%), HOMO→L+11 (36%)                                                |
| 48 | 54196 | 184.52 | 0.01 | H-6→L+1 (14%), H-4→L+5 (31%), HOMO→L+11 (21%)                                 |
| 49 | 54283 | 184.22 | 0.01 | H-4→L+5 (25%), HOMO→L+11 (27%)                                                |
| 50 | 54772 | 182.58 | 0.00 | H-1→L+8 (56%), H-1→L+10 (15%)                                                 |
| 51 | 54976 | 181.90 | 0.00 | HOMO→L+13 (71%)                                                               |
| 52 | 55186 | 181.21 | 0.01 | H-5→L+3 (95%)                                                                 |

|    |       |        |      |                                                                 |
|----|-------|--------|------|-----------------------------------------------------------------|
| 53 | 55218 | 181.10 | 0.10 | H-4→L+4 (11%), H-3→L+4 (17%), H-2→L+4 (49%)                     |
| 54 | 55462 | 180.30 | 0.01 | H-2→L+5 (22%), H-2→L+6 (53%)                                    |
| 55 | 55701 | 179.53 | 0.06 | H-4→L+4 (20%), H-3→L+4 (43%)                                    |
| 56 | 55771 | 179.30 | 0.03 | H-3→L+4 (10%), HOMO→L+12 (36%), HOMO→L+14 (13%)                 |
| 57 | 55959 | 178.70 | 0.00 | H-2→L+7 (42%), HOMO→L+14 (12%)                                  |
| 58 | 55993 | 178.59 | 0.00 | H-1→L+9 (12%), HOMO→L+14 (40%)                                  |
| 59 | 56098 | 178.26 | 0.00 | H-16→LUMO (73%)                                                 |
| 60 | 56256 | 177.76 | 0.00 | H-1→L+9 (11%), HOMO→L+12 (32%), HOMO→L+14 (12%)                 |
| 61 | 56460 | 177.12 | 0.01 | H-3→L+6 (28%), H-2→L+7 (13%), H-1→L+9 (16%)                     |
| 62 | 56702 | 176.36 | 0.00 | H-5→L+4 (66%)                                                   |
| 63 | 56743 | 176.23 | 0.01 | H-4→L+6 (36%)                                                   |
| 64 | 56917 | 175.70 | 0.01 | H-2→L+8 (50%), H-2→L+9 (14%)                                    |
| 65 | 57052 | 175.28 | 0.05 | H-6→L+2 (76%)                                                   |
| 66 | 57087 | 175.17 | 0.01 | H-3→L+6 (27%), H-3→L+7 (30%)                                    |
| 67 | 57142 | 175.00 | 0.00 | H-3→L+7 (11%), H-1→L+10 (25%), HOMO→L+15 (15%)                  |
| 68 | 57241 | 174.70 | 0.00 | H-7→L+1 (72%), H-7→L+2 (20%)                                    |
| 69 | 57446 | 174.08 | 0.00 | H-4→L+7 (50%), HOMO→L+15 (17%)                                  |
| 70 | 57513 | 173.88 | 0.01 | H-4→L+7 (11%), H-1→L+10 (15%), HOMO→L+15 (47%)                  |
| 71 | 57734 | 173.21 | 0.02 | H-5→L+5 (53%)                                                   |
| 72 | 57802 | 173.00 | 0.03 | H-4→L+11 (25%), H-3→L+11 (10%), H-2→L+11 (16%), H-1→L+11 (11%)  |
| 73 | 58005 | 172.40 | 0.03 | H-3→L+8 (10%), H-1→L+11 (54%)                                   |
| 74 | 58126 | 172.04 | 0.00 | H-9→L+1 (80%)                                                   |
| 75 | 58312 | 171.49 | 0.02 | H-3→L+8 (36%), H-1→L+11 (20%)                                   |
| 76 | 58459 | 171.06 | 0.10 | H-8→L+1 (62%)                                                   |
| 77 | 58507 | 170.92 | 0.00 | H-2→L+8 (12%), H-2→L+9 (57%)                                    |
| 78 | 58651 | 170.50 | 0.03 | H-15→LUMO (74%), H-8→L+1 (11%)                                  |
| 79 | 58901 | 169.78 | 0.00 | H-4→L+8 (59%)                                                   |
| 80 | 59115 | 169.16 | 0.01 | H-1→L+13 (14%), HOMO→L+16 (56%)                                 |
| 81 | 59211 | 168.89 | 0.00 | H-7→L+1 (21%), H-7→L+2 (73%)                                    |
| 82 | 59269 | 168.72 | 0.00 | H-3→L+9 (47%), H-1→L+12 (21%)                                   |
| 83 | 59477 | 168.13 | 0.00 | H-1→L+13 (42%), H-1→L+14 (24%), HOMO→L+17 (15%)                 |
| 84 | 59805 | 167.21 | 0.01 | H-1→L+12 (10%), H-1→L+13 (25%), H-1→L+14 (15%), HOMO→L+16 (14%) |
| 85 | 59944 | 166.82 | 0.00 | H-5→L+6 (34%), H-4→L+9 (12%), HOMO→L+17 (10%)                   |

|     |       |        |      |                                                                 |
|-----|-------|--------|------|-----------------------------------------------------------------|
| 86  | 59960 | 166.78 | 0.00 | H-5→L+6 (47%), H-4→L+9 (15%)                                    |
| 87  | 60035 | 166.57 | 0.00 | H-6→L+3 (81%)                                                   |
| 88  | 60283 | 165.88 | 0.01 | H-4→L+9 (19%), H-1→L+14 (18%), HOMO→L+17 (23%)                  |
| 89  | 60299 | 165.84 | 0.00 | H-2→L+10 (59%)                                                  |
| 90  | 60378 | 165.62 | 0.02 | H-17→LUMO (18%), H-4→L+9 (16%), H-1→L+12 (19%)                  |
| 91  | 60549 | 165.15 | 0.02 | H-17→LUMO (25%), H-1→L+14 (20%)                                 |
| 92  | 60876 | 164.27 | 0.12 | H-3→L+11 (20%), H-2→L+11 (20%)                                  |
| 93  | 60960 | 164.04 | 0.04 | H-3→L+10 (35%), H-1→L+15 (14%)                                  |
| 94  | 61146 | 163.54 | 0.01 | HOMO→L+18 (80%)                                                 |
| 95  | 61410 | 162.84 | 0.00 | H-4→L+10 (22%), H-3→L+10 (19%), H-1→L+15 (18%), HOMO→L+19 (14%) |
| 96  | 61478 | 162.66 | 0.04 | H-4→L+10 (13%), H-4→L+11 (13%), H-3→L+11 (14%), H-2→L+11 (11%)  |
| 97  | 61678 | 162.13 | 0.02 | H-5→L+7 (32%), HOMO→L+19 (32%)                                  |
| 98  | 61790 | 161.84 | 0.01 | H-8→L+2 (12%), H-5→L+7 (26%), HOMO→L+19 (18%)                   |
| 99  | 61806 | 161.80 | 0.00 | H-11→L+1 (47%), HOMO→L+20 (15%)                                 |
| 100 | 61862 | 161.65 | 0.01 | H-11→L+1 (26%), H-5→L+7 (14%), HOMO→L+20 (19%)                  |
